# Supplementary material for: DNA methylation subtypes guiding prognostic assessment and linking to responses the DNA methyltransferase inhibitor SGI-110 in urothelial carcinoma
Source: BMC Med. 2022 Jul 18;20:222. doi: 10.1186/s12916-022-02426-w (PMC9290251; doi:10.1186/s12916-022-02426-w)
Supplement: Supplementary file 2 — Additional file 2. Summary of sequencing information in samples. [file 12916_2022_2426_MOESM2_ESM.xlsx]

## Sheet: WGBS
Summary of whole genome bisulfite sequencing (WGBS) in patients and cell lines
PatientID	TumorType	Reference	Raw reads	Trim reads	Mapping-rate	BS-rate	Mean_seqCover(>=1)	Mean_seqCover(>=3)	Mean_seqCover(>=5)	Mean_seqDepth
T1	UTUC	hg19	105329932	101194651	0.797	0.999371	0.8926	0.799	0.6396	6.5214
T2	UTUC	hg19	87125604	83958603	0.724	0.99908	0.853	0.675	0.4803	5.4468
T3	UTUC	hg19	79148176	75265143	0.773	0.99908	0.873	0.6783	0.423	5.4468
T4	UTUC	hg19	76688848	73208033	0.805	0.99908	0.865	0.647	0.38	3.978
T5	UTUC	hg19	195115154	167718781	0.759	0.99908	0.9	0.85	0.744	8.423
T6	UTUC	hg19	69383012	62854969	0.757	0.99908	0.84	0.577	0.32	3.582
T7	UTUC	hg19	94300519	90746368	0.829	0.99908	0.882	0.754	0.574	6.154
T8	UTUC	hg19	79713677	72465387	0.801	0.99908	0.875	0.689	0.433	4.393
T9	UTUC	hg19	70052959	62930518	0.743	0.99908	0.87	0.628	0.326	3.647
T10	UTUC	hg19	75269779	67551696	0.834	0.999	0.858	0.632	0.391	4.157
T11	UTUC	hg19	77148666	69660878	0.791	0.999	0.863	0.63	0.365	3.942
T13	UTUC	hg19	69548574	64896318	0.82	0.998	0.793	0.527	0.335	4.036
T14	UTUC	hg19	72813888	67300237	0.829	0.999	0.865	0.653	0.405	4.216
T15	UTUC	hg19	62857173	57716241	0.735	0.999	0.827	0.542	0.285	3.321
T16	UTUC	hg19	73333607	67329830	0.792	0.999	0.837	0.603	0.386	4.264
T17	UTUC	hg19	73961341	69846947	0.786	0.999	0.827	0.599	0.393	4.353
T35	UTUC	hg19	71499617	66060736	0.849	0.998	0.854	0.658	0.44	4.541
T36	UTUC	hg19	78871556	76670936	0.762	0.999	0.883	0.733	0.501	4.924
T37	UTUC	hg19	88151799	81839440	0.848	0.999	0.868	0.71	0.521	5.328
T38	UTUC	hg19	82203983	80090861	0.667	0.999	0.872	0.66	0.393	4.305
T40	UTUC	hg19	78420375	76382587	0.794	0.999	0.874	0.7	0.478	4.946
T41	UTUC	hg19	72234343	70238746	0.805	0.999	0.868	0.673	0.432	4.475
T42	UTUC	hg19	79993779	73862380	0.846	0.999	0.864	0.687	0.477	4.865
T43	UTUC	hg19	89680915	89680915	0.799	0.999	0.874	0.682	0.439	4.456
T44	UTUC	hg19	145487570	142882844	0.8309	0.996	0.9011	0.8568	0.7539	8.4017
T45	UTUC	hg19	155216074	150750264	0.7837	0.996	0.9061	0.8558	0.7402	8.4414
T46	UTUC	hg19	125485042	121160211	0.7197	0.996	0.8999	0.8375	0.6975	6.7008
T47	UTUC	hg19	139269714	137254738	0.7796	0.996	0.8982	0.8472	0.7485	8.536
T48	UTUC	hg19	150636457	141915924	0.7587	0.996	0.8996	0.8484	0.7358	7.8759
T49	UTUC	hg19	145875630	142922272	0.7887	0.996	0.9002	0.85	0.7343	8.0081
T50	UTUC	hg19	166719747	162927423	0.8371	0.996	0.9082	0.8792	0.807	9.136
T51	UTUC	hg19	179818311	175940698	0.8392	0.996	0.9087	0.8824	0.8164	9.8532
T52	UTUC	hg19	153275866	150566760	0.8219	0.996	0.9038	0.8807	0.8254	10.1492
T53	UTUC	hg19	203703821	200025888	0.8205	0.996	0.9087	0.8863	0.8368	12.2923
T54	UTUC	hg19	140744348	137076212	0.8038	0.996	0.903	0.8671	0.7709	8.7155
T55	UTUC	hg19	123164837	120261369	0.7823	0.996	0.898	0.8357	0.7076	7.6162
T44-nomal	Normal	hg19	166083981	157468914	0.7788	0.997	0.9027	0.8735	0.7847	7.5895
T49-nomal	Normal	hg19	135767761	133125703	0.7644	0.998	0.9024	0.8631	0.7541	7.2935
T50-nomal	Normal	hg19	138422287	135647280	0.7719	0.998	0.9065	0.8612	0.7489	7.3396
T51-nomal	Normal	hg19	158454088	154809763	0.6867	0.998	0.908	0.8686	0.7602	7.6153
T24	cell line	hg19	149741403	145482082	0.7199	0.997	0.9	0.8441	0.7132	7.143
T24 treatment	cell line	hg19	137952674	135376937	0.8189	0.997	0.8987	0.8391	0.7105	7.4368
UMUC-3	cell line	hg19	138335096	134713133	0.7723	0.997	0.8974	0.8382	0.7148	7.7318
UMUC-3 treatment	cell line	hg19	145649735	142881254	0.6897	0.997	0.8923	0.8073	0.6581	7.169

## Sheet: RNA-seq
Summary of RNA-sequencing(RNA-seq) in patients
PatientID	TumorType	Reference	Raw reads	Trim reads	Mapping-rate
T44	UTUC	hg19	22835558	21094460	0.9414
T45	UTUC	hg19	26020816	24119629	0.9493
T46	UTUC	hg19	22299321	20026075	0.8615
T47	UTUC	hg19	27750825	24540891	0.8477
T48	UTUC	hg19	26821578	24823514	0.9339
T49	UTUC	hg19	15190027	13936059	0.915
T50	UTUC	hg19	25650539	24151113	0.9511
T52	UTUC	hg19	24829944	23146527	0.9386
T55	UTUC	hg19	23731755	22193325	0.9523
Summary of RNA-sequencing(RNA-seq) in cell lines
Cell line	Concentration(SGI110,uM)	Reference	Raw reads	Trim reads	Mapping-rate
T24	0	hg19	31863186	30380984	0.5845
T24	1	hg19	29896869	28170550	0.8466
T24	2	hg19	36429526	34128205	0.9188
T24	4	hg19	32694403	30796163	0.9116
UMUC-3	0	hg19	29701542	27718713	0.8079
UMUC-3	1	hg19	27437659	26017708	0.7416
UMUC-3	2	hg19	32039880	30524301	0.7304
UMUC-3	4	hg19	31245581	28913024	0.6643
