# Supplementary material for: DNA methylation subtypes guiding prognostic assessment and linking to responses the DNA methyltransferase inhibitor SGI-110 in urothelial carcinoma
Source: BMC Med. 2022 Jul 18;20:222. doi: 10.1186/s12916-022-02426-w (PMC9290251; doi:10.1186/s12916-022-02426-w)
Supplement: Supplementary file 3 — Additional file 3. Summary of the regions of methylation classification in three cohorts. [file 12916_2022_2426_MOESM3_ESM.xlsx]

## Sheet: Discovery cohort
Summary of two components in DNA methylation subtypes
Component1	Component2
chr15:37387276:37387614	chr3:172355911:172356107
chr15:53847437:53847516	chr3:183642843:183642935
chr15:54051224:54051336	chr13:92482391:92482476
chr5:139227441:139228069	chr10:128069127:128069166
chr4:154354124:154354404	chr1:232556937:232557096
chr1:213898742:213898866	chr7:116082527:116082796
chr8:2183068:2183152	chr11:105004025:105004105
chr7:143582429:143582678	chr20:60110317:60110492
chr13:95359175:95359247	chr3:85866911:85866950
chr12:104681923:104682057	chr8:42749694:42749999
chr7:50346986:50347082	chr8:112403050:112403149
chr10:119309689:119309805	chr8:132647434:132647793
chr1:61087297:61087533	chr6:167089446:167089599
chr10:70321843:70322131	chr6:161860471:161860767
chr9:128409198:128409368	chr20:45637823:45637945
chr6:16700830:16701028	chr14:82027416:82027553
chr6:108442906:108443024	chr10:11335786:11335926
chr5:87975009:87975150	chr22:48776751:48776930
chr10:119292980:119293208	chr2:216363280:216363466
chr6:28921392:28921849	chr4:78803185:78803264
chr10:118892029:118892219	chr10:133998060:133998151
chr6:28664112:28664326	chr17:49200057:49200187
chr4:155662676:155662877	chr4:10782603:10783045
chr12:47226197:47226454	chr13:61496793:61496929
chr3:74040957:74041074	chr2:105048411:105048590
chr1:95201138:95201376	chr4:140808143:140808290
chr12:81107933:81108211	chr5:112538919:112539395
chr2:219737857:219737975	chr6:136869869:136870126
chr6:166029451:166029646	chr5:101118463:101118630
chr5:42949249:42949681	chr1:150783678:150783768
chr1:182509406:182509521	chr15:98491164:98491367
chr17:55532800:55532972	chr7:148902894:148903302
chr2:35401526:35401568	chr21:37356937:37357155
chr6:28661712:28661925	chr10:101768405:101768643
chr4:75264149:75264379	chr3:182154378:182154508
chr8:74282708:74283008	chr8:103121102:103121273
chr6:10392164:10392278	chr4:77532904:77533035
chr7:27241870:27242340	chr10:15590479:15590590
chr14:29253399:29253631	chr13:91948417:91948562
chr1:151812210:151812725	chr16:2722209:2722408
chr20:20750369:20750497	chr3:172052712:172052826
chr1:208096109:208096226	chr17:70712382:70712721
chr13:97654055:97654170	chr20:61571229:61571316
chr2:19555703:19556273	chr17:31989953:31990132
chr5:180651500:180651777	chr3:184918581:184918694
chr1:31595795:31595888	chr18:39409727:39409897
chr1:39193457:39193566	chr1:199321602:199321727
chr12:81102356:81102768	chr12:110302689:110302808
chr1:119528348:119528717	chr15:34636042:34636250
chr15:38377337:38377449	chr5:15140621:15140728
chr18:55096420:55096550	chr4:13907269:13907369
chr12:31499241:31499323	chr10:1030422:1030522
chr12:104853072:104853275	chr17:60243147:60243369
chr17:71548282:71548416	chr1:247611745:247612047
chr17:38096571:38096695	chr8:8534358:8534517
chr10:69130655:69130770	chr21:35027962:35028067
chr1:241715148:241715337	chr8:121624287:121624444
chr3:79898469:79898566	chr3:121799733:121799855
chr9:21968049:21968763	chr8:119154741:119154815
chr18:58048376:58048436	chr7:6341959:6342208
chr16:79915145:79915238	chr6:69632316:69632428
chr2:198120455:198120617	chr14:77638393:77638528
chr17:1251121:1251247	chr8:94678705:94678779
chr13:112723335:112723644	chr12:57174365:57174620
chr14:95237027:95237163	chr15:54191761:54191911
chr16:33490577:33490826	chr2:197157230:197157465
chr7:96641146:96641233	chr18:7778490:7778677
chr6:49468978:49469163	chr7:9998306:9998419
chr13:30947966:30948123	chr11:58285166:58285301
chr1:163661969:163662158	chr16:24739403:24739639
chr5:140740725:140740815	chr13:26061347:26061434
chr7:96621049:96621196	chr17:6274931:6275102
chr2:109938523:109938641	chr7:158831319:158831442
chr1:210410743:210410882	chr7:92325129:92325360
chr18:56939029:56939246	chr7:90995067:90995185
chr5:19338059:19338130	chr3:23715358:23715410
chr21:36577346:36577582	chr13:96409594:96409718
chr1:119521882:119522025	chr3:143363179:143363263
chr2:45121281:45121399	chr6:6901358:6901696
chr3:182044945:182045113	chr3:5165581:5165881
chr1:81602996:81603069	chr11:17485061:17485337
chr14:99707638:99707765	chr7:148930580:148930854
chr12:58150644:58150890	chr10:26910789:26910903
chr16:79497882:79497961	chr3:195865964:195866073
chr7:156409689:156409905	chr17:46343933:46344168
chr8:103463325:103463501	chr20:53992535:53992611
chrX:130435226:130435327	chr4:25875576:25875873
chr11:88721174:88721237	chr6:37071990:37072295
chr10:3133735:3133935	chr2:157340652:157340986
chr20:46296279:46296367	chr6:149140574:149140643
chr6:27858751:27859219	chr11:103900639:103900801
chr18:12307160:12307650	chr16:77025599:77025742
chr17:40400724:40401018	chr15:71901929:71902186
chr19:16042431:16042532	chr10:32230463:32230648
chr4:85417018:85417370	chr15:76924419:76924570
chr3:181442887:181443144	chr11:123687865:123687967
chr15:25093192:25093606	chr7:35379281:35379412
chr15:45671276:45671360	chr7:107707203:107707303
chr13:77388881:77388982	chr14:33819020:33819196
chr6:26305339:26305571	chr1:8121849:8122047
chr8:9188978:9189137	chr16:28033864:28034012
chr19:2239224:2239335	chr10:31815786:31815887
chr6:170362097:170362155	chr15:79244163:79244390
chr9:14366193:14366430	chr5:124177703:124177821
chr6:105403885:105404107	chr8:40691528:40691675
chr19:12266453:12266533	chr1:214382264:214382472
chr1:119522368:119523030	chr7:6280472:6280574
chr4:69239374:69239606	chr10:19467713:19467821
chr10:119310257:119310538	chr20:51699967:51700106
chr6:26320376:26320516	chr3:1245114:1245413
chr18:11484718:11484879	chr8:66560277:66560532
chr16:29086793:29086859	chr7:147105774:147105916
chr16:82260027:82260188	chr12:6471154:6471521
chr14:38054387:38054821	chr21:26573807:26573933
chr20:54261056:54261181	chr1:239495511:239495652
chr10:12305827:12305954	chr7:44583220:44583610
chr14:85141701:85141821	chr8:138930722:138930844
chr15:37389287:37389618	chr1:240530787:240531055
chr1:244372888:244372987	chr11:66557469:66557697
chr3:66723826:66723878	chr15:44301172:44301264
chr1:156131100:156131443	chr7:87177989:87178216
chr4:186659551:186659632	chr13:40591490:40591560
chr18:4011032:4011171	chr22:33423303:33423439
chr6:28174875:28174942	chr1:174207940:174208432
chr7:111721109:111721252	chr8:102015486:102015837
chr19:49777694:49777822	chr10:50748123:50748429
chr6:3943385:3943454	chr8:136810663:136810842
chr14:103744909:103745254	chr14:90848369:90848500
chr10:104518641:104518823	chr14:47991063:47991165
chr20:45548338:45548503	chr2:116168631:116168765
chr12:114847910:114847980	chr9:119871281:119871422
chr12:71108947:71109049	chr6:170649304:170649429
chr10:131425887:131425987	chr3:173633409:173633523
chr10:10721991:10722108	chr1:240807861:240808053
chr9:109622028:109622199	chr1:84744688:84744808
chrX:99252485:99252571	chr11:33993312:33993682
chr5:19489395:19489506	chr13:100751632:100751754
chr9:129296038:129296128	chr17:5176199:5176383
chr11:118098700:118098858	chr8:121605108:121605209
chr7:156240629:156240745	chr9:140609838:140610163
chr2:82068312:82068424	chr7:158932961:158933118
chr6:164374109:164374294	chr17:5749488:5749622
chr10:108158828:108158953	chr1:151322383:151322510
chr4:122685129:122685390	chr5:59784102:59784370
chr7:96641456:96641559	chr1:87901906:87902042
chr10:13037386:13037629	chr21:46993395:46993547
chr1:9486939:9487124	chr12:85171686:85171781
chr11:115396220:115396422	chr12:31399641:31399830
chr20:33064006:33064397	chr1:239143571:239143869
chr9:73026707:73026843	chr3:120285772:120285876
chr12:12164681:12164811	chr15:101758178:101758304
chr2:204571215:204571408	chr1:183627191:183627410
chr4:32367130:32367256	chr17:54240268:54240378
chr5:115912100:115912560	chr21:15669490:15669682
chr3:169383902:169384207	chrX:32096430:32096546
chr9:79641562:79641692	chr5:152437283:152437392
chr1:15655626:15655784	chr1:243558010:243558111
chr6:139583798:139583915	chr5:6399182:6399331
chr13:101803525:101803611	chr16:56203807:56203911
chr14:79909192:79909311	chr6:9343207:9343315
chr7:406134:406531	chr5:23530253:23530403
chr12:114836919:114837109	chr15:57107522:57107830
chr2:124461016:124461282	chr12:16535971:16536208
chr5:23207656:23207773	chr22:49850854:49851143
chr2:240162170:240162556	chr5:64410203:64410344
chr16:52532675:52532793	chr7:38102335:38102545
chr22:39338094:39338232	chr9:10302510:10302614
chr15:24114387:24114732	chr10:2863391:2863645
chr11:95239179:95239285	chr8:13518604:13518721
chrX:120149412:120149576	chr1:209054946:209055173
chr6:51056151:51056311	chr1:52659469:52659760
chr3:83141492:83141603	chr7:148375506:148375628
chr12:113194817:113195047	chr16:24293584:24293886
chr19:52410371:52410483	chr5:16758192:16758320
chr13:111045344:111045440	chr1:175314104:175314193
chr1:17677769:17677884	chr7:32440872:32441042
chr17:77846646:77846754	chr14:75326771:75326927
chr5:135230103:135230340	chr2:234399562:234399668
chr8:23088236:23088278	chr8:2229176:2229257
chr13:110696820:110697040	chr8:84787901:84788060
chr13:108454126:108454269	chr8:55003140:55003310
chr14:95438167:95438334	chr22:47733323:47733450
chr8:53012387:53012495	chr12:126265096:126265187
chr6:85475337:85475440	chr7:20621641:20621761
chr13:110510349:110510416	chr2:44974202:44974325
chr9:79346870:79346969	chr5:163686531:163686605
chr14:98629350:98629492	chr8:82832437:82832617
chr6:27513206:27513571	chr7:27831655:27831781
chr10:6913219:6913354	chr12:81371182:81371292
chr4:48754953:48755065	chr21:45280292:45280453
chr18:24804795:24804920	chr15:26544474:26544608
chr6:4553691:4553916	chr13:99431183:99431271
chr3:78554776:78554941	chr7:32697704:32697812
chr1:203434399:203434534	chr10:85247898:85248021
chr12:98911531:98911692	chr14:95208720:95208801
chr19:41712715:41712877	chr22:50918292:50918502
chr17:14736321:14736449	chr8:3057175:3057384
chr2:107713412:107713519	chr1:240122272:240122410
chr13:33543980:33544015	chr2:149351313:149351546
chr6:9577633:9577798	chr17:80031697:80031873
chr11:20593119:20593211	chr7:156194063:156194158
chr9:99481705:99481842	chr11:71229258:71229384
chr8:124085729:124085881	chr6:78163797:78164055
chr14:85134575:85134727	chr21:25456948:25457052
chr5:27411759:27411844	chr5:12545307:12545406
chr10:39104291:39104413	chr7:14107803:14107859
chr14:85085116:85085241	chr8:32986894:32987081
chr6:169100074:169100389	chr3:181351479:181351592
chr21:42233849:42233920	chr5:6945967:6946104
chr7:22717179:22717360	chr19:33592193:33592424
chr4:111551079:111551338	chr3:116086476:116086576
chr9:34773229:34773323	chr5:24079094:24079159
chr16:33948575:33948627	chr16:68970396:68970528
chr15:28203252:28203370	chr8:85859745:85860043
chr15:98487995:98488160	chr2:579623:579799
chr3:118116341:118116517	chr8:83118690:83119015
chr6:27271225:27271393	chr17:47674073:47674148
chr18:76582167:76582317	chr10:106693677:106693802
chr7:96619576:96619843	chr8:49616891:49617204
chr9:36808622:36808769	chr3:168825411:168825603
chr11:80322897:80322981	chr17:66377525:66377577
chr17:68834113:68834199	chr3:130424530:130424650
chr6:19742797:19742864	chr1:166574653:166574825
chr3:79023542:79023667	chr5:152200679:152200826
chr11:132642753:132642809	chr9:9609493:9609612
chr3:115517136:115517262	chr18:58028971:58029058
chr10:27548601:27548712	chr15:88947980:88948168
chr15:24451252:24451423	chr4:15887292:15887351
chr1:30639137:30639252	chr1:237301400:237301522
chr12:17736198:17736293	chr3:107408361:107408476
chrX:34883464:34883567	chr10:90402257:90402347
chr10:117703369:117703455	chr7:56569939:56570072
chr10:10965321:10965488	chr1:91761510:91761637
chr19:54877591:54877828	chr11:133730149:133730241
chr8:8945947:8946052	chr14:94893384:94893502
chr10:11252282:11252416	chr19:14321492:14321799
chr1:245215135:245215294	chr10:8636025:8636221
chr18:55097101:55097204	chr8:37681698:37681783
chr9:133892435:133892622	chr2:1099860:1099956
chr8:60195332:60195393	chrX:32579249:32579460
chr3:109255958:109256038	chr10:2393152:2393251
chr8:56542730:56543003	chr1:28422834:28423043
chr10:112553279:112553381	chr3:151112406:151112642
chr17:46590528:46590658	chr10:4213130:4213275
chr4:5951103:5951221	chr6:7580809:7581096
chr8:95183053:95183210	chr12:86498028:86498191
chr17:21537015:21537071	chr6:62000741:62000847
chr17:36251871:36251952	chr7:3242927:3243179
chr13:107448236:107448327	chr14:90377096:90377168
chr1:3003289:3003467	chr11:55648243:55648378
chr8:17784728:17784867	chr8:122788468:122788604
chr5:34450946:34451059	chr18:40084554:40084828
chr2:109787854:109788049	chr10:71784647:71784709
chr15:95941090:95941252	chr8:117967829:117967949
chr1:80905417:80905570	chr1:248025151:248025323
chr1:22708921:22708954	chr8:88200680:88200779
chr7:24466390:24466514	chr10:15531162:15531273
chr5:76010401:76010516	chr8:102450466:102450644
chr10:37654742:37654894	chr10:23563300:23563430
chr21:45577464:45577871	chr19:6371411:6371674
chr4:177447917:177448049	chr13:24768751:24768915
chr11:80408533:80408613	chr19:57468018:57468283
chr9:109422210:109422308	chr7:115788881:115789003
chrX:86226141:86226263	chr6:63606976:63607166
chr2:234157688:234157773	chr12:103316191:103316321
chr3:120069672:120069765	chr12:46747392:46747523
chr2:16263566:16263695	chr8:12345735:12346282
chr11:125109947:125110228	chr17:79999298:79999338
chr17:35303200:35303316	chr7:90269101:90269566
chr10:77684427:77684567	chr3:132724012:132724453
chr13:66177833:66177880	chr18:63049297:63049454
chr8:81478005:81478514	chr11:14655291:14655778
chr2:178586937:178587044	chr6:44171615:44171833
chr5:145235917:145236393	chr14:21788481:21788746
chr19:47805819:47805953	chr2:37589239:37589502
chrX:36996228:36996337	chr7:114670675:114671149
chr2:76934168:76934280	chr4:190366115:190366208
chr16:67524280:67524411	chr4:114315062:114315107
chr7:53878044:53878141	chr6:62539003:62539269
chr4:45220209:45220312	chr4:185408770:185409004
chr15:23900037:23900170	chr5:16065320:16065376
chr1:81485906:81486076	chr7:144613645:144613740
chr8:58905089:58905181	chr2:146081776:146081923
chr3:80252952:80253031	chr2:80032845:80033043
chr8:52183391:52183507	chr2:43950937:43951003
chr8:94449994:94450105	chr21:31780066:31780184
chr3:16525977:16526088	chr14:105725306:105725379
chr18:69259533:69259801	chr20:44541389:44541542
chr2:228642996:228643123	chr17:46652451:46652551
chr18:7549579:7549702	chr14:27043465:27043581
chr10:3709228:3709382	chr3:4992893:4993025
chr7:28946838:28946883	chr17:28333020:28333129
chr8:12967254:12967382	chr13:94617418:94617710
chr10:92567586:92567808	chr3:32708072:32708392
chr6:164992006:164992049	chr6:5819312:5819384
chr10:66403086:66403300	chr17:78667775:78668114
chr2:63982439:63982537	chr4:182461291:182461434
chr2:80537966:80538085	chr10:54078695:54078793
chr16:17933220:17933439	chr21:20967652:20967880
chr8:56832342:56832497	chr8:23957448:23957589
chr7:79998340:79998443	chr16:86221354:86221625
chr8:15756624:15756707	chr8:144277770:144277864
chr5:88368825:88369023	chr17:64916532:64916768
chr16:86748373:86748463	chr9:17268761:17269165
chr15:69995980:69996083	chr2:109450206:109450531
chr6:10969818:10969939	chr22:37855425:37855551
chr15:24374127:24374257	chr20:36983204:36983298
chr2:26045101:26045369	chr7:20784900:20784985
chr3:55326391:55326457	chr15:31384899:31385003
chr5:27637373:27637515	chr11:4298663:4298881
chr10:54010757:54010944	chr10:23330270:23330348
chr8:54795091:54795547	chr15:101636849:101636972
chr5:27317865:27317985	chr8:1596115:1596425
chr1:243070998:243071131	chr2:66412831:66413024
chr10:11302121:11302354	chr15:65862020:65862108
chr5:150458091:150458236	chr7:125438855:125438952
chr6:66677634:66677869	chr3:189710743:189710941
chr11:123152547:123152641	chr13:22702792:22702871
chr20:6917179:6917259	chr7:108168534:108168683
chr21:35574923:35575199	chr17:71824272:71824428
chr9:98324461:98324593	chr7:7839209:7839284
chr10:4588859:4588930	chr12:2743442:2743747
chr5:117677101:117677270	chr8:8531213:8531602
chr8:1233787:1233918	chr15:74441692:74441926
chr11:17487774:17487895	chr15:87411779:87411945
chr1:80676969:80677202	chr1:238114889:238115063
chr2:119564431:119564590	chr14:81104916:81105016
chr21:41934810:41934863	chr16:26682585:26682723
chr10:21167888:21168026	chr16:67871467:67871598
chr3:59915165:59915258	chr6:154818143:154818292
chr4:42491232:42491358	chr7:158831609:158831686
chr3:87843350:87843477	chr1:158592821:158592935
chr20:51685866:51686005	chr7:79619543:79619893
chr16:33424425:33424509	chr7:116364117:116364544
chr22:32899082:32899265	chr15:39030166:39030281
chr15:54172640:54172721	chr4:183562285:183562448
chr6:14816440:14816580	chr4:28366163:28366305
chr20:53618796:53618991	chr6:50326022:50326065
chr2:30033113:30033213	chr3:73431963:73432083
chr10:55785448:55785549	chr5:28287389:28287676
chr2:106412159:106412320	chr4:71566870:71566980
chr8:14616186:14616256	chr7:146997261:146997364
chr6:164373864:164373988	chr11:127634991:127635110
chr1:15392777:15393042	chr3:132888711:132888784
chrX:82261302:82261519	chr20:44039586:44039762
chr8:21147235:21147352	chr1:29203072:29203300
chr6:162532163:162532354	chr4:182815460:182815573
chr2:225818341:225818466	chr3:188301412:188301539
chr14:40015118:40015255	chr8:19366608:19366704
chr7:53684039:53684147	chr19:53402746:53403142
chr5:17527777:17527950	chr11:127764051:127764169
chr8:757452:757549	chr7:92939955:92940088
chr5:32218242:32218316	chr20:47297295:47297437
chr20:6929945:6930078	chr10:12083008:12083101
chr6:66424330:66424366	chr18:40181830:40181944
chr2:65456718:65456880	chr8:17707587:17707665
chr3:44939462:44939540	chr3:40429403:40429651
chr3:89649078:89649172	chr15:88086921:88087175
chr15:33488179:33488300	chr1:154254086:154254317
chr18:50832004:50832036	chr5:2796052:2796143
chr16:51868244:51868387	chr12:24777445:24777597
chr2:147319320:147319413	chr18:67218044:67218181
chr11:105024880:105024945	chr5:87565542:87565714
chr3:181723662:181724053	chr1:206217874:206217973
chr2:56788777:56788874	chr7:147185329:147185466
chr8:6762772:6762893	chr8:72361241:72361354
chr8:52049913:52050030	chr7:51418184:51418306
chr9:4458680:4458785	chr8:144137013:144137275
chr2:217936342:217936453	chr2:238197900:238198032
chrX:11178285:11178494	chr10:130977934:130978031
chrX:41190294:41190559	chr7:128602215:128602421
chr8:94610141:94610333	chr9:103362712:103362853
chr2:111875088:111876061	chr2:128959236:128959437
chr9:139136515:139136602	chr5:110418850:110419110
chr2:173150626:173150761	chr15:102177888:102178104
chr18:7921417:7921536	chr7:50893284:50893462
chr8:28227803:28227986	chr10:17664265:17664356
chr13:104007495:104007606	chr22:24065871:24066082
chr2:52001159:52001239	chr7:146745149:146745268
chr5:2712233:2712382	chr7:10198695:10198812
chr14:79756574:79756677	chr11:97851962:97852096
chr10:3977528:3977660	chr18:7203606:7204219
chr20:45528399:45528588	chr8:78079402:78079484
chr9:86056208:86056280	chr7:7605391:7605747
chr7:98905790:98905905	chr9:95710483:95710748
chr18:68955519:68955714	chr9:76074310:76074435
chr22:47703691:47703818	chr2:238769767:238769911
chr22:16258655:16258845	chr21:19486833:19486974
chr20:51437290:51437387	chr2:127337542:127337700
chr2:213295151:213295268	chr1:240448739:240448807
chr3:77788523:77788641	chr19:47017348:47017561
chr13:26479640:26479734	chr22:40583736:40583790
chr1:48127492:48127560	chr11:116613928:116614051
chr7:26039580:26039627	chr10:134703172:134703482
chr18:69326392:69326523	chr1:170293145:170293320
chr22:21025362:21025708	chr21:20854704:20854917
chr10:123781426:123781710	chr8:24557162:24557334
chr21:39125362:39125453	chr7:118512136:118512197
chr10:133635378:133635458	chr6:73739378:73739623
chr3:169378143:169378248	chr9:11406158:11406369
chr7:89726359:89726454	chr16:13041398:13041534
chrX:82237615:82237874	chr16:7605585:7605686
chrX:98802648:98802794	chr15:91530190:91530374
chr20:13183336:13183456	chr8:114812873:114813047
chr21:30077292:30077386	chr2:13187274:13187414
chr13:91888049:91888169	chr18:62591360:62591445
chr4:104641701:104641897	chr2:49901207:49901277
chr17:69283369:69283498	chr4:176645433:176645628
chr13:100392783:100392953	chr2:101861367:101861659
chr7:29120540:29120653	chr13:111744073:111744284
chr13:76901767:76901981	chr6:84686648:84686733
chr10:62423845:62423879	chr7:21181836:21181995
chr12:29963854:29963951	chr5:171223122:171223238
chr6:106985546:106985620	chr10:114323326:114323451
chr18:3120557:3120665	chr16:21567992:21568281
chr4:94819338:94819473	chr1:95957508:95957598
chr6:116693413:116693610	chr1:23693489:23693674
chr6:66733612:66733684	chr1:106433650:106433854
chr3:16930515:16930668	chr21:18900152:18900268
chr7:143793273:143793369	chr3:28500677:28500892
chr4:23868473:23868569	chr20:59689569:59689758
chr4:90816623:90816679	chr4:177055446:177055557
chr7:148678058:148678165	chr15:41421448:41421775
chr11:115442067:115442185	chr5:142625366:142625624
chr11:98475854:98475918	chr3:153224122:153224685
chr21:9673867:9673972	chr5:163389546:163389675
chr18:8419139:8419247	chr6:32849980:32850171
chr11:83581846:83582060	chr11:127071309:127071416
chr10:15296732:15296897	chr14:92734986:92735077
chr9:117084576:117084672	chr2:200593118:200593251
chr6:16215580:16215673	chr8:130257379:130257593
chr3:88445279:88445477	chr1:225907957:225908301
chr8:48871585:48871711	chr5:15140433:15140540
chr15:41626339:41626474	chr7:141963453:141963531
chr3:55314367:55314537	chr7:153605878:153606084
chr18:7044110:7044225	chr16:29752028:29752425
chr4:111559750:111559819	chr19:3329882:3330103
chr1:10868991:10869040	chr7:74078191:74078544
chr1:82982715:82982892	chr1:40268701:40268764
chrX:46557714:46557822	chr6:164336317:164336492
chr18:65850083:65850158	chr22:32998285:32998418
chr9:71047765:71047861	chr14:23700901:23701295
chr7:53435164:53435231	chr8:73115389:73115525
chr17:35287277:35287385	chr3:55123592:55123756
chr1:92444905:92444988	chr4:43081571:43081823
chr6:951994:952131	chr6:16345146:16345253
chr1:88932293:88932429	chr1:237134630:237134745
chr6:6711962:6712057	chr18:13841951:13842312
chr18:9095343:9095435	chr13:20740296:20740488
chr16:87112076:87112168	chr2:7597024:7597418
chr1:104887263:104887359	chr3:121657115:121657619
chr1:197883106:197883311	chr4:183222965:183223096
chr14:103701230:103701348	chr17:69701003:69701125
chr16:10646990:10647377	chr20:57498471:57498644
chr4:93553714:93553783	chr13:59356503:59356693
chrX:132920157:132920410	chr9:105315572:105315665
chr5:9873697:9873838	chr4:66379135:66379266
chr2:197033823:197034085	chr17:2642836:2642970
chr2:178651546:178651660	chr7:126292243:126292404
chr9:76958495:76958599	chr14:26349220:26349389
chr8:58489875:58490030	chr6:153446728:153446852
chr6:153664725:153664806	chr2:125366305:125366483
chr7:131713871:131714016	chr15:98966190:98966269
chr2:16881969:16882115	chr8:71461628:71461733
chr6:30094947:30095100	chr8:141116193:141116385
chr5:27094026:27094212	chr14:70033032:70033263
chr11:81061021:81061149	chr10:72784929:72785121
chr4:163469163:163469246	chr6:85980386:85980604
chr10:39088773:39088869	chr16:48642058:48642210
chr3:59058505:59058592	chr8:110651939:110652056
chr5:18450108:18450211	chr5:31131664:31131750
chr14:62620601:62620729	chr3:174691391:174691491
chr1:10869151:10869310	chr16:78991715:78991936
chr6:125427348:125427426	chr2:222235651:222235734
chr13:80387313:80387434	chr2:80245482:80245685
chr6:65468803:65469019	chr10:69853748:69853909
chr13:100707805:100707937	chr8:85587979:85588110
chr7:37448608:37448704	chr4:154873668:154873892
chr11:60569238:60569356	chr1:200054028:200054161
chr2:138239396:138239575	chr14:83548171:83548407
chr6:28781763:28781988	chr16:76327090:76327251
chr10:125240348:125240570	chr19:52772170:52772306
chr8:50304321:50304427	chr5:53841826:53841956
chr16:32966875:32967056	chr1:247933752:247933878
chr7:116919985:116920154	chr4:188624864:188624955
chr5:23411278:23411554	chr10:37873938:37874066
chr2:129968104:129968347	chr7:19579540:19579681
chr2:123768881:123769057	chr4:17018057:17018292
chr11:30590669:30590797	chr5:29999846:30000005
chr17:26216487:26216625	chr16:13977213:13977372
chr14:88625272:88625383	chr6:76952903:76953024
chr10:3877948:3878053	chr13:112914192:112914331
chr16:21656539:21656757	chr9:4174713:4174939
chr5:27575739:27575834	chr4:183853969:183854083
chr17:41069256:41069379	chr7:71300361:71300502
chr1:171624129:171624306	chr3:28802503:28802731
chr1:112746530:112746668	chr3:177094862:177095118
chr4:166962555:166962731	chr6:49764781:49765189
chr2:156542944:156543170	chr12:79884194:79884313
chr11:113936215:113936390	chr21:20120420:20120519
chr9:30800570:30800766	chr1:244309770:244309919
chr1:5071079:5071169	chr6:47202127:47202609
chr19:34384791:34384949	chr4:183323219:183323343
chrX:17903651:17903801	chr7:18688778:18688863
chr18:66937724:66937770	chr16:82868665:82868777
chr7:53098079:53098152	chr16:12236884:12237361
chr8:70785154:70785203	chr8:134224475:134224910
chr9:18964158:18964288	chr2:6371131:6371249
chr7:48977974:48978140	chr17:29239744:29239879
chr15:96896661:96896811	chr5:11105857:11106019
chr2:1378035:1378213	chr6:62604607:62604698
chr7:14011565:14011722	chr3:179720745:179720871
chr1:235051901:235051978	chr10:70184295:70184693
chr5:19374063:19374176	chr16:13511005:13511096
chr2:142771712:142771812	chr19:9108655:9108752
chr19:4916569:4917057	chr13:63371945:63372127
chr4:31397972:31398166	chr4:186967230:186967346
chr7:157363660:157363955	chr13:92674283:92674400
chr6:55759329:55759462	chr3:47093646:47093823
chr3:81999268:81999309	chr8:85573232:85573453
chr2:13817708:13817820	chr8:144242798:144242905
chr5:26823187:26823374	chr17:21228040:21228183
chr9:113660790:113660879	chr1:242578853:242579103
chr12:33653090:33653220	chr4:186348541:186348966
chr22:40357502:40357681	chr3:98044224:98044367
chr2:102721147:102721332	chr1:161368299:161368628
chr14:84727388:84727649	chr7:37267147:37267280
chr16:27037322:27037512	chr7:123167949:123168396
chr3:116689465:116689567	chr22:44953158:44953381
chr8:82939364:82939470	chr8:76758112:76758195
chr10:83147727:83147884	chr10:2699176:2699390
chr6:66930132:66930231	chr6:5115540:5115722
chr19:39108019:39108098	chr14:48276107:48276286
chr3:19420855:19420993	chr5:166846428:166846549
chr8:32159247:32159317	chr3:192682371:192682488
chr7:122449527:122449589	chr10:108523687:108523765
chr4:8964142:8964219	chr4:45843706:45843799
chr4:15376599:15376719	chr13:112897138:112897250
chr16:34870577:34870647	chr14:48437472:48437610
chr10:68784625:68784680	chr3:25754943:25755133
chr3:164392305:164392437	chr6:1729887:1729999
chr4:163440706:163440765	chr11:127267797:127267918
chr10:17673602:17673763	chr11:126664560:126664631
chr1:195598450:195598584	chr1:2959631:2959733
chr9:130539831:130540226	chr1:243141535:243141622
chr8:93416082:93416358	chr11:120338478:120338607
chr15:84005695:84005759	chr5:163622617:163622722
chr14:88473038:88473178	chr7:100796956:100797049
chr16:63461509:63461645	chr21:24641739:24641857
chr14:35899685:35899746	chr14:50548585:50548892
chr4:88644144:88644254	chr15:77448498:77448988
chr4:101612602:101612683	chr4:125864492:125864715
chr4:78058704:78058800	chr3:196399578:196399809
chr7:33602392:33602485	chr17:53864967:53865120
chr2:68589453:68589530	chr1:227204673:227204774
chr11:125179346:125179580	chr10:132237854:132238009
chr18:69175764:69176042	chr7:129484324:129484461
chr19:58221012:58221220	chr5:178946715:178947045
chr18:10927298:10927441	chr8:57475759:57476013
chr8:10433394:10433485	chr11:14912115:14912390
chr15:47458725:47458802	chr2:104081405:104081539
chr19:5855280:5855407	chr7:18977730:18977811
chr19:30812413:30812452	chr18:31114840:31114899
chrX:81806956:81807046	chr19:8745107:8745221
chr4:12914125:12914255	chr8:33819295:33819416
chr6:65216494:65216633	chr13:111691869:111692064
chr1:105157525:105157620	chr5:163801774:163801862
chr18:9648031:9648124	chr8:34207889:34208081
chr21:16992015:16992067	chr8:134918037:134918089
chr2:85955203:85955408	chr1:198940674:198940795
chr12:80702615:80702759	chr1:212457150:212457374
chr18:11817807:11817910	chr15:86002442:86002578
chr4:49150527:49150587	chr21:36988085:36988159
chr6:112465962:112466122	chr7:148481317:148481481
chr8:142160094:142160299	chr4:26223349:26223597
chr20:42079952:42080048	chr4:124815782:124816066
chr20:4208910:4209164	chr15:26611889:26612074
chr16:25856730:25856817	chr6:62615799:62616069
chr1:196082827:196082957	chr8:144220561:144220683
chr18:13912943:13913129	chr6:141179795:141179927
chr21:38076508:38077271	chr1:174941727:174941868
chr4:60916092:60916138	chr5:38762481:38762549
chr7:40323013:40323132	chr1:240381287:240381456
chr11:98390230:98390333	chr7:9917881:9918160
chr16:24436663:24436783	chr9:88004431:88004581
chr2:81117110:81117210	chr5:14108369:14108433
chr5:71079131:71079258	chr1:237384256:237384353
chr10:66358041:66358149	chr19:53404623:53404745
chr5:27581127:27581242	chr1:203298063:203298201
chr13:39199304:39199439	chr18:33061891:33061998
chr3:165484386:165484435	chr5:30745404:30745495
chr10:11905876:11906049	chr8:49413883:49414064
chr3:96252472:96252687	chr3:143317431:143317521
chr5:5261745:5261853	chr2:179616478:179616568
chr4:94249175:94249264	chr8:85018481:85018707
chr1:188201731:188201816	chr13:110042509:110042648
chr10:128151849:128151958	chr2:139402409:139402591
chr3:147628664:147628774	chr10:129289667:129289820
chr20:58403655:58403802	chr9:71895018:71895336
chr3:55469619:55469681	chr1:240362132:240362400
chr7:4488592:4488690	chr2:79015711:79015865
chr13:72145953:72146120	chr15:33926377:33926504
chr12:83775122:83775188	chr21:43815962:43816281
chr12:28931046:28931138	chr7:10898709:10898811
chr8:134131947:134132084	chr7:145153446:145153645
chr3:88336708:88336779	chr1:237791142:237791371
chr1:67922390:67922600	chr19:56247146:56247346
chr7:40603953:40604062	chr7:9069519:9069632
chr3:26974617:26974738	chr7:120401968:120402172
chrX:113237095:113237198	chr18:75206632:75206961
chrX:50500683:50500780	chr7:17349606:17349714
chr5:7201136:7201357	chr6:150166461:150166599
chr19:3898325:3898426	chr5:147541300:147541429
chr9:81726971:81727099	chr1:246930863:246930982
chr11:78424604:78424827	chr2:46918147:46918272
chr6:9893723:9893816	chr22:46009177:46009920
chr4:81117537:81117743	chr8:36167197:36167348
chr4:13548011:13548133	chr6:127368123:127368193
chr15:32344800:32344918	chr7:67600281:67600449
chr17:53959693:53959903	chr2:104710207:104710333
chr2:53537387:53537586	chr7:116311299:116311451
chr13:110564071:110564190	chr15:27030003:27030240
chr3:517185:517366	chr4:46285761:46285978
chr11:115145336:115145490	chr4:185157800:185157905
chr5:42991495:42991888	chr1:238441645:238441782
chr9:78842971:78843043	chr8:17352688:17352899
chr5:21055447:21055544	chr4:183603013:183603167
chr14:22483637:22483839	chr15:93460601:93460780
chr1:223812719:223812855	chr8:28570535:28570721
chr12:88084101:88084225	chr4:184557746:184557960
chr20:55913689:55913823	chr14:48610997:48611236
chr7:22341030:22341273	chr5:31135930:31136023
chr13:80703423:80703525	chr3:74039881:74040355
chr10:110483436:110483540	chr7:26053852:26053991
chr8:10206845:10206901	chr8:73687596:73687820
chr9:72877862:72877938	chr13:65520914:65521026
chrX:81600613:81600735	chr1:199552234:199552327
chr6:9012985:9013084	chr15:59026629:59026854
chr8:65087363:65087417	chr7:17350221:17350316
chr13:109940900:109940945	chr3:128058515:128058651
chr14:84023243:84023435	chr5:157722607:157722869
chr12:109298989:109299092	chr5:25064512:25064600
chr11:83463049:83463139	chr12:12911911:12912151
chr19:20371769:20371811	chr1:200148392:200148572
chr21:22056149:22056419	chr1:50058806:50059028
chr14:98655999:98656148	chr17:32529634:32529836
chr19:28760625:28760674	chr16:6820481:6820554
chr13:88000146:88000292	chr6:150393793:150393962
chr1:188361939:188362070	chr5:108654283:108654371
chr1:177703898:177704034	chr4:182712243:182712411
chr2:46116304:46116416	chr15:88379951:88380070
chr7:50664072:50664175	chr17:68181023:68181109
chr2:35907566:35907707	chr20:19894580:19894765
chr20:56123836:56123915	chr16:6645397:6645439
chr10:83267110:83267239	chr2:234396541:234396603
chr18:38821230:38821455	chr13:36658466:36658512
chr6:168920669:168920754	chr8:27945047:27945239
chr18:10898311:10898502	chr7:153635647:153635804
chrX:141276185:141276319	chr6:169233369:169233530
	chr7:28415950:28416179
	chr3:6776255:6776374
	chr6:56044455:56044648
	chr8:71792010:71792173
	chr2:2289899:2290050
	chr8:112267341:112267468
	chr1:220128422:220128548
	chr8:49835882:49836231
	chr1:31474708:31474855
	chr13:23054377:23054494
	chr8:871247:871473
	chr7:14392408:14392536
	chr1:170221713:170221855
	chr3:131050334:131050803
	chr1:77244780:77244900
	chr7:142274491:142274731
	chr2:116983062:116983330
	chr18:6663023:6663211
	chr21:17651999:17652135
	chr8:116197971:116198029
	chr7:154064028:154064158
	chr2:183915973:183916059
	chr8:22835816:22835987
	chr3:185406350:185406625
	chr15:69362539:69362684
	chr10:130640620:130640707
	chr1:25074204:25074324
	chr12:61944288:61944419
	chr17:36387786:36387887
	chr7:109150411:109150525
	chr4:13944982:13945189
	chr4:16696810:16696952
	chr1:11329786:11329908
	chr15:85976970:85977681
	chr17:63743814:63743917
	chr11:91379584:91379682
	chr4:42592234:42592364
	chr20:52480818:52480931
	chr10:11161823:11161891
	chr3:30792520:30792633
	chr16:24063954:24064057
	chr5:154657431:154657553
	chr8:110974927:110975022
	chr11:104025045:104025129
	chr15:89682638:89682823
	chr16:46874213:46874294
	chr12:100040164:100040389
	chr21:21702098:21702227
	chr13:93571092:93571226
	chr7:152523118:152523234
	chr15:67223637:67223766
	chr6:158571884:158571972
	chr2:100450566:100450647
	chr7:130058287:130058424
	chr16:26846679:26846952
	chr16:74408269:74408543
	chr4:176226820:176226921
	chr12:124766624:124766702
	chr8:114212860:114212971
	chr5:6141325:6141521
	chr2:12715458:12715639
	chr14:29316452:29316525
	chr8:57397288:57397551
	chr6:158321369:158321552
	chr6:165563610:165563681
	chr6:13505745:13505840
	chr18:21035058:21035208
	chr7:19235480:19235697
	chr19:33251976:33252046
	chr7:37276877:37276998
	chr3:89796761:89797211
	chr12:93838908:93839012
	chr14:55929490:55929720
	chr10:13605135:13605482
	chr10:101421270:101421381
	chr10:134958516:134958776
	chr12:126941329:126941448
	chr5:6298391:6298605
	chr7:146826155:146826245
	chr12:113838684:113839001
	chr1:241207498:241207722
	chr6:18341592:18341741
	chr12:99367634:99367705
	chr7:125950631:125950853
	chr2:44511465:44511569
	chr16:85538041:85538138
	chr8:104089451:104089590
	chr22:26498102:26498178
	chr2:26590842:26590907
	chr15:88224065:88224356
	chr18:9652176:9652356
	chr5:10453647:10453856
	chr17:14992059:14992195
	chr5:16509426:16509636
	chr1:1400296:1400600
	chr3:10473147:10473287
	chr12:130279405:130279513
	chr20:57531144:57531343
	chr12:8146188:8146402
	chr11:71391133:71391304
	chr1:185825346:185825447
	chr1:242783386:242783627
	chr12:129794357:129794492
	chr4:181264075:181264179
	chr1:219942566:219942702
	chr10:109406547:109406664
	chr18:46473480:46473769
	chr7:107772947:107773159
	chr8:80389033:80389154
	chr14:104996576:104996693
	chr5:5357650:5357769
	chr1:185796083:185796283
	chr3:68642253:68642334
	chr16:15722922:15723035
	chr14:48995587:48995676
	chr17:75132727:75132882
	chr18:71034751:71034885
	chr20:22166587:22166788
	chr5:5915686:5915806
	chr5:338095:338228
	chr16:8029610:8029922
	chr11:99621776:99621897
	chr3:102503844:102503986
	chr21:19982048:19982129
	chr12:5695084:5695184
	chr7:2726417:2726647
	chr6:169946050:169946160
	chr14:48799427:48799686
	chr3:21348467:21348599
	chr4:19290051:19290223
	chr19:54999004:54999157
	chr20:58899973:58900263
	chr15:58534219:58534363
	chr3:97682793:97682937
	chr16:8624300:8624407
	chr1:46849675:46849749
	chr7:120866011:120866081
	chr1:199988879:199989001
	chr1:199591115:199591187
	chr21:37561803:37561859
	chr1:111274585:111274697
	chr7:125363992:125364099
	chr8:65712024:65712166
	chr6:74755644:74755798
	chr13:94682210:94682412
	chr10:133128694:133128902
	chr10:74436528:74436756
	chr14:48588160:48588234
	chr7:48240790:48241115
	chr6:61992375:61992523
	chr6:123957826:123957959
	chr2:122419708:122419846
	chr16:26216970:26217035
	chr4:189183975:189184190
	chr11:133676748:133676989
	chr21:25707231:25707426
	chr2:175470021:175470192
	chr7:148843076:148843433
	chrX:32191513:32191778
	chr4:176436114:176436176
	chr9:14323657:14323781
	chr1:26848138:26848241
	chr5:30265443:30265575
	chr12:92171447:92171540
	chr8:78455008:78455082
	chr10:127173962:127174084
	chr16:55202857:55203037
	chr4:84533509:84533633
	chr1:248213308:248213413
	chr19:10723279:10723671
	chr3:171529787:171529955
	chr10:2423770:2423897
	chr11:126154577:126154795
	chr13:94903628:94903734
	chr13:73754170:73754304
	chr1:219122184:219122226
	chr2:49674961:49675198
	chr1:208837566:208837653
	chr7:151445163:151445287
	chr2:121091393:121091464
	chr8:106459959:106460070
	chr15:97194629:97194700
	chr3:182812837:182813066
	chr2:186611436:186611521
	chr14:88139131:88139242
	chr1:238570726:238570987
	chr22:27492633:27492777
	chr1:35661129:35661384
	chr14:53648382:53648637
	chr8:6171327:6171499
	chr20:33417619:33417868
	chr19:33849470:33849590
	chr4:48332809:48332840
	chr13:63111569:63111652
	chr5:162416221:162416363
	chr7:146338146:146338459
	chr14:26597279:26597384
	chr22:17154527:17154637
	chr13:25425193:25425321
	chr13:98720836:98720990
	chr14:47708277:47708409
	chr4:183148995:183149088
	chr9:7647957:7648087
	chr5:1393510:1393608
	chr12:129899265:129899371
	chr19:55305222:55305405
	chr4:190652094:190652234
	chr21:42005166:42005253
	chr6:169486294:169486374
	chr1:88641388:88641497
	chr12:51688078:51688208
	chr12:19767406:19767526
	chr10:94171205:94171286
	chr1:111332455:111332583
	chr22:46158070:46158219
	chr7:151249252:151249449
	chr2:132853573:132853703
	chr21:45406806:45407046
	chr15:38792878:38792994
	chr1:238922995:238923176
	chr11:42170883:42170975
	chr4:182428861:182428998
	chr14:90167167:90167388
	chr14:83025365:83025469
	chr3:79457173:79457364
	chr4:65870432:65870529
	chr12:127547739:127547852
	chr12:129773713:129773918
	chr10:23586799:23587045
	chr4:174651377:174651492
	chr4:95868781:95868913
	chr13:86086641:86086771
	chr1:213204145:213204282
	chr1:220630880:220630999
	chr15:53746880:53746936
	chr1:92356007:92356134
	chr15:60688405:60688623
	chr16:14569497:14569629
	chr4:182405211:182405274
	chr1:205605376:205605505
	chr6:137493729:137493848
	chr8:58983838:58984053
	chr3:56792338:56792434
	chr22:43351210:43351396
	chr1:240734721:240734853
	chr22:19287919:19288062
	chr16:3252516:3252615
	chr4:88226317:88226616
	chr7:33542787:33542966
	chr2:45438082:45438194
	chr15:69743757:69743834
	chr20:61887266:61887460
	chr7:146528462:146528595
	chr4:42137555:42137741
	chr5:157856085:157856353
	chr13:42533687:42534104
	chr8:111076506:111076714
	chr3:187739672:187739845
	chr2:8090331:8090404
	chr6:16444219:16444342
	chr5:15033435:15033583
	chr4:19894023:19894219
	chr13:81160220:81160444
	chr15:94613220:94613300
	chr2:191472776:191472941
	chr12:10268611:10268723
	chr4:24825672:24825814
	chr12:18958920:18959015
	chr16:81933279:81933381
	chr7:76228763:76228989
	chr5:2819708:2819816
	chr3:180200671:180200805
	chr1:106625652:106625887
	chr4:18695861:18696043
	chr7:92435958:92436032
	chr7:139685203:139685279
	chr7:19164427:19164533
	chr2:238073376:238073517
	chr15:60315182:60315418
	chr1:244365784:244365900
	chr1:201997859:201998120
	chr4:29389312:29389441
	chr1:71506184:71506278
	chr8:58602089:58602265
	chr15:78305110:78305589
	chr3:183361852:183362012
	chr15:76195548:76195668
	chr3:192980771:192980886
	chr2:113563184:113563465
	chr12:66418120:66418270
	chr7:154017281:154017424
	chr7:32050897:32051040
	chr13:73640012:73640138
	chr1:66220776:66221075
	chr8:112224386:112224446
	chr13:77553863:77554043
	chr4:175699634:175700092
	chr4:108438701:108438788
	chr1:237926590:237926693
	chr8:3038180:3038301
	chr5:967689:967888
	chr12:129931378:129931507
	chr8:108840280:108840503
	chr17:42522276:42522332
	chr7:147622581:147622849
	chr11:95932770:95933006
	chr10:36878647:36878758
	chr9:88853958:88854117
	chr8:42012281:42012514
	chr8:52387527:52387700
	chr5:3082475:3082594
	chr6:36526235:36526402
	chr2:164458085:164458204
	chr2:50534311:50534416
	chr6:10317679:10317811
	chr1:248165942:248166115
	chr20:43346569:43346815
	chr16:56018822:56018915
	chr12:1311493:1311622
	chr7:25165937:25166088
	chr2:78174075:78174191
	chr14:47837220:47837342
	chr5:103010831:103010919
	chr14:24579498:24579610
	chr17:56297311:56297516
	chr3:31331639:31331705
	chr3:189769900:189769990
	chr11:122663215:122663414
	chr8:112428366:112428467
	chr12:8438052:8438472
	chr2:79706728:79707028
	chr6:73296887:73296971
	chr15:87667579:87667839
	chr6:137018413:137018515
	chr18:49389853:49390072
	chr5:130233188:130233745
	chr2:1056847:1056946
	chr1:198832141:198832354
	chr6:88127534:88127647
	chr16:5694750:5694860
	chr12:127781185:127781455
	chr15:22551812:22551931
	chr8:54442283:54442425
	chr10:25699405:25699494
	chr20:9701827:9701923
	chr4:189615580:189615810
	chr13:61397105:61397169
	chr4:181525814:181525955
	chr7:70883747:70884049
	chr15:81989524:81989929
	chr13:109638235:109638366
	chr8:67866909:67867357
	chr15:61742170:61742278
	chr4:42441496:42441615
	chr4:190337100:190337219
	chr6:50237047:50237171
	chr1:185066348:185066463
	chr21:20995633:20995758
	chr14:73708217:73708580
	chr4:17187085:17187305
	chr7:37224470:37224692
	chr12:126950385:126950492
	chr20:11309564:11309694
	chr10:19907870:19908038
	chr22:39331435:39331786
	chr2:124975831:124975924
	chr21:25852744:25852837
	chr10:32226252:32226497
	chr2:208880586:208880716
	chr2:51231649:51231830
	chr16:11900763:11900900
	chr2:190351176:190351321
	chr14:29918662:29918860
	chr13:104333844:104334075
	chr11:111577970:111578077
	chr18:62867917:62868012
	chr12:7830869:7831071
	chr16:8024444:8024781
	chr4:163959714:163960088
	chr15:61979139:61979233
	chr10:110468992:110469030
	chr1:101935057:101935180
	chr6:85549974:85550099
	chr5:29418516:29418737
	chr12:112437123:112437184
	chr9:120634265:120634530
	chr21:19702547:19702669
	chr4:172570305:172570438
	chr2:6038437:6038629
	chr1:37241094:37241162
	chr13:25445506:25445623
	chr1:184115761:184115892
	chr5:25732639:25732860
	chr9:137387782:137387927
	chr4:189940488:189940733
	chr2:38308818:38308869
	chr13:35323336:35323509
	chr13:92741344:92741560
	chr2:1263683:1263903
	chr13:66559792:66559992
	chr8:83660279:83660481
	chr11:102142998:102143109
	chr10:33445402:33445486
	chr12:7635179:7635401
	chr5:165765837:165765992
	chr16:6832031:6832242
	chr10:130937080:130937204
	chr20:44756117:44756259
	chr14:64218424:64218763
	chr11:122092419:122092529
	chr2:4880337:4880474
	chr13:66841081:66841202
	chr4:73720302:73720395
	chr4:46174780:46174921
	chr17:9663364:9663574
	chr1:232065940:232066134
	chr9:8605876:8605998
	chr4:5213720:5213815
	chr6:21102557:21102633
	chr4:80745866:80746066
	chr4:5091559:5091669
	chr1:239274094:239274509
	chr2:50249310:50249416
	chr4:121046764:121046885
	chr18:75806111:75806222
	chr1:193982545:193982672
	chr7:137033992:137034165
	chr2:224369111:224369196
	chr11:134440163:134440266
	chr1:242087318:242087521
	chr1:4241085:4241168
	chr16:64861651:64861894
	chr7:79505819:79506029
	chr3:143530562:143530629
	chr8:73152497:73152606
	chr5:155736641:155736748
	chr5:51673633:51673869
	chr8:102516332:102516458
	chr4:390857:391001
	chr8:112998810:112998963
	chr7:7462430:7462544
	chr1:230907769:230907948
	chr5:157947181:157947409
	chr3:184234332:184234564
	chr22:30158346:30158626
	chr8:57489313:57489443
	chr14:83633992:83634315
	chr4:184270723:184270935
	chr15:60818748:60818911
	chr5:146060958:146061075
	chr3:101442616:101442885
	chr3:2299394:2299620
	chr1:198828157:198828250
	chr5:125703482:125703743
	chr20:12394990:12395137
	chr1:7220448:7220531
	chr15:87658426:87658574
	chr18:32800385:32800571
	chr7:146330748:146330909
	chr10:110117466:110117735
	chr1:238108506:238108630
	chr12:127489881:127490004
	chr3:121450251:121450336
	chr2:57839146:57839375
	chr16:81361641:81361748
	chr7:27175522:27175645
	chr20:59249656:59249761
	chr4:177992588:177992649
	chr8:8522680:8522927
	chr3:147415746:147415817
	chr1:237611415:237611600
	chr8:49539538:49539892
	chr11:1057163:1057374
	chr1:237608664:237608843
	chr20:36925674:36925817
	chr12:120148747:120148949
	chr3:32987740:32987930
	chr4:7143646:7143736
	chr11:55955245:55955361
	chr1:241440572:241440716
	chr7:70799029:70799149
	chr8:64289623:64289924
	chr1:160965235:160965415
	chr3:8569361:8569576
	chr10:6689402:6689504
	chr5:3716428:3716534
	chr10:17363104:17363244
	chr8:2023791:2023919
	chr12:633958:634040
	chr4:165021937:165022348
	chr3:27235639:27235902
	chr9:8690249:8690384
	chr1:218995061:218995194
	chr1:199262876:199262998
	chr16:26215843:26215966
	chr3:155471198:155471252
	chr22:50769818:50769939
	chr7:157046632:157046866
	chr2:62042477:62042583
	chr21:25371311:25371446
	chr12:128307015:128307152
	chr14:93728700:93728814
	chr18:8673660:8673840
	chr8:65936215:65936329
	chr14:50826375:50826469
	chr4:140787881:140788083
	chr9:98678589:98678726
	chr2:116985000:116985072
	chr4:17264873:17265009
	chr4:18634751:18634847
	chr16:77753265:77753396
	chr18:1402200:1402310
	chr3:5275266:5275358
	chr15:20465329:20465464
	chr2:217356424:217356535
	chr17:41912640:41912850
	chr18:65452027:65452110
	chr4:22863829:22863988
	chr21:26587191:26587226
	chr8:112115657:112115776
	chr18:75825032:75825289
	chr12:99926162:99926240
	chr22:25356405:25356583
	chr7:137783228:137783351
	chr7:21237622:21237740
	chr11:123487339:123487581
	chr16:56552434:56552635
	chr1:104333753:104333900
	chr17:73989405:73990002
	chr15:97509558:97509695
	chr12:104764817:104765000
	chr22:36880315:36880578
	chr10:131644944:131645058
	chr22:19923135:19923463
	chr2:201652328:201652765
	chr7:37136116:37136311
	chr17:60602872:60603000
	chr10:17007342:17007477
	chr8:74848086:74848219
	chr1:240536204:240536463
	chr3:1698388:1698568
	chr17:36426344:36426548
	chr7:14055615:14055836
	chr7:136814891:136815069
	chr3:179170952:179171110
	chr21:17759453:17759606
	chr1:144524053:144524230
	chr3:122508795:122508962
	chr21:18909219:18909323
	chr12:89769154:89769429
	chr15:45815851:45816024
	chr16:64266387:64266516
	chr7:154064918:154065049
	chr3:118452224:118452369
	chr2:10637202:10637347
	chr19:30812828:30812961
	chr16:53563786:53563912
	chr4:22259597:22259905
	chr3:123363616:123363698
	chr3:174460980:174461119
	chr1:216047455:216047519
	chr11:118710576:118710745
	chr7:70559567:70559891
	chr8:6594168:6594297
	chr10:10948705:10948975
	chr6:139831798:139831968
	chr1:234077769:234078003
	chr1:239616161:239616262
	chr5:60464779:60464900
	chr11:38199743:38200016
	chr18:7048224:7048313
	chr7:71074188:71074335
	chr5:34974267:34974482
	chr11:90645904:90645949
	chr5:147655246:147655623
	chr20:19128276:19128556
	chr13:93766004:93766131
	chr6:71906548:71906737
	chr12:20880689:20880877
	chr12:23751988:23752105
	chr14:58335262:58335481
	chr15:95770224:95770297
	chr1:170695376:170695508
	chr22:49446518:49446635
	chr12:110662632:110662835
	chr2:234465509:234465698
	chr1:40446962:40447186
	chr1:226666758:226667073
	chr13:67608305:67608423
	chr2:28870931:28871016
	chr6:112506434:112506520
	chr13:114973738:114973823
	chr2:50021336:50021466
	chr5:24593377:24593482
	chr8:85601419:85601560
	chr6:24647358:24647626
	chr5:11450644:11450998
	chr4:178298727:178298856
	chr19:264790:264888
	chr18:36081049:36081114
	chr2:34221248:34221347
	chr17:30132158:30132545
	chr11:123281735:123281955
	chr2:131962449:131962738
	chr5:66917106:66917251
	chr14:48846632:48846849
	chr7:98039038:98039133
	chr12:95231259:95231302
	chr12:126305239:126305372
	chr6:50644530:50644702
	chr4:17316088:17316331
	chr11:89409776:89409918
	chr3:193914727:193914948
	chr13:92636671:92636822
	chr1:82146075:82146247
	chr1:239510076:239510197
	chr7:69039901:69040150
	chr8:18334946:18335104
	chrX:147433159:147433256
	chr20:41538784:41538906
	chr13:94759261:94759367
	chr14:74473946:74474125
	chr4:182806439:182806714
	chr7:9850390:9850582
	chr2:3982403:3982562
	chr16:79007023:79007279
	chr16:81256434:81256569
	chr15:85426871:85426937
	chr3:24492755:24492850
	chr11:98283815:98283887
	chr4:119377516:119377639
	chr1:207927044:207927197
	chr19:34624808:34624976
	chr8:115079834:115080021
	chrX:133974581:133974697
	chr7:81644095:81644199
	chr4:18433029:18433117
	chr4:19346332:19346608
	chr13:52416076:52416230
	chr8:86258762:86258987
	chr2:116936382:116936481
	chr5:171902977:171903164
	chr2:237285821:237285907
	chr15:46021424:46021527
	chr5:30508679:30508771
	chr5:12456294:12456389
	chr1:18896340:18896576
	chr11:127505714:127505783
	chr10:83788793:83788920
	chr5:165455772:165455977
	chr4:30271573:30271704
	chr15:37656499:37656579
	chr1:238528330:238528497
	chr1:54408551:54408695
	chr3:126492177:126492297
	chr17:53433362:53433490
	chr3:75038853:75038981
	chr21:21865908:21866031
	chr14:83114348:83114459
	chr10:17698153:17698288
	chr7:84857615:84857718
	chr17:56201567:56201673
	chr4:43167051:43167302
	chr8:77510328:77510462
	chr4:177804777:177804824
	chr1:241152903:241153075
	chr16:6330596:6330726
	chr19:30966073:30966217
	chr2:22221546:22221753
	chr18:9719807:9720030
	chr13:23299977:23300282
	chr21:24594743:24595084
	chr18:72078863:72079091
	chr18:50880187:50880379
	chr19:54728630:54728767
	chr3:72077978:72078062
	chr12:130171468:130171552
	chr19:8221194:8221362
	chr1:239600859:239600940
	chr8:57666487:57666805
	chr15:33832200:33832272
	chr21:45898097:45898235
	chr8:41373201:41373325
	chr6:70395088:70395228
	chr8:1768634:1768732
	chr10:37009449:37009573
	chr8:132689431:132689604
	chr4:104827201:104827339
	chr11:131843439:131843690
	chr10:25138117:25138199
	chr3:130936348:130936485
	chr2:50461999:50462040
	chr13:70033136:70033210
	chr8:112526010:112526114
	chr17:56505685:56505999
	chr1:40053535:40053662
	chr3:179911195:179911254
	chr8:114896424:114896517
	chr21:31707967:31708177
	chr7:68315183:68315408
	chr5:159306740:159306973
	chr12:123401202:123401400
	chr2:115407649:115407773
	chr9:74421537:74421676
	chr4:190421391:190421578
	chr1:198995747:198995986
	chr4:21732950:21733096
	chr14:75953564:75953676
	chr15:98689316:98689598
	chr8:136251876:136252011
	chr5:5894683:5894829
	chr4:118174335:118174403
	chr8:36314809:36314993
	chr3:137360349:137360521
	chr2:1339351:1339489
	chr10:5440602:5440715
	chr18:40711710:40711838
	chr12:27165650:27165995
	chr8:84522392:84522569
	chr3:186122073:186122182
	chr6:44308793:44308896
	chr15:98150903:98151014
	chr12:128819772:128819894
	chr7:90228695:90228815
	chr22:27682838:27682966
	chr20:59381596:59381695
	chr13:67863178:67863313
	chr6:1724451:1724613
	chr5:5506987:5507093
	chr7:146148077:146148328
	chrX:144229968:144230100
	chr11:99389017:99389159
	chr14:87398190:87398344
	chr2:13195526:13195820
	chr7:45462791:45462840
	chr6:164058015:164058218
	chr3:4128682:4128853
	chr7:153891691:153891844
	chr3:135741887:135742018
	chr22:25102438:25102636
	chr13:109751325:109751480
	chr13:54199560:54199791
	chr4:183302777:183303009
	chr1:82219000:82219111
	chr3:2507054:2507348
	chr8:93582925:93583050
	chr7:29232610:29232774
	chr12:65777658:65777770
	chr4:67220195:67220369
	chr6:46760990:46761212
	chr7:21030118:21030361
	chr16:7743108:7743333
	chr1:83296484:83296602
	chrX:51693123:51693357
	chr18:6805547:6805674
	chr7:146432905:146433003
	chr5:8408936:8409037
	chr15:91294653:91294808
	chr1:240975229:240975335
	chr10:69740109:69740180
	chr6:126682396:126682532
	chr16:19033937:19034163
	chr18:41200134:41200398
	chr3:77885833:77885947
	chr10:33287303:33287445
	chr1:238843928:238844152
	chr1:229038525:229038653
	chr5:50608795:50609131
	chr2:88895988:88896128
	chr2:169390707:169390904
	chr12:119609010:119609150
	chr3:6917117:6917237
	chr16:71840994:71841067
	chr1:240462467:240462528
	chr10:121004515:121004768
	chr17:55292406:55292543
	chr12:15567021:15567213
	chr7:97470168:97470329
	chr16:8967453:8967636
	chr1:246889216:246889488
	chr17:74847473:74847746
	chr7:48958303:48958415
	chr1:17825741:17825865
	chr2:122718552:122718650
	chr14:58931588:58931745
	chr10:34461992:34462128
	chr16:23741659:23741771
	chr18:31911079:31911551
	chr6:26552450:26552559
	chr9:74909216:74909490
	chr7:120767778:120767864
	chr6:20201777:20201898
	chr4:112229457:112229571
	chr11:130359795:130360181
	chr8:1906202:1906598
	chr8:36150604:36150908
	chr17:52101208:52101401
	chr2:65303660:65303780
	chr19:53447529:53447720
	chr17:66913082:66913238
	chr21:47813867:47814401
	chrX:13433886:13434006
	chr3:189506718:189506856
	chr7:30809757:30809935
	chr3:67116687:67116859
	chr8:36421093:36421315
	chr20:43417961:43418184
	chr12:61787771:61787885
	chr3:34639652:34639782
	chr21:17429790:17429911
	chr1:4384160:4384380
	chrX:29935210:29935348
	chr12:79242953:79243056
	chr8:114567246:114567376
	chr1:113378386:113378472
	chr1:242923237:242923360
	chr7:158093917:158094059
	chr2:179610805:179610900
	chr2:178594852:178594996
	chr7:54422265:54422377
	chr5:33347973:33348084
	chr4:129175143:129175271
	chr17:58403639:58403833
	chr19:55296810:55297035
	chr4:20525687:20525878
	chr16:17129800:17129898
	chr10:100322248:100322450
	chr4:183995569:183995672
	chr5:162510605:162510738
	chr11:128357361:128357452
	chr10:36883429:36883629
	chr13:78624884:78624988
	chr6:8083443:8083501
	chr20:22357289:22357512
	chr13:108138476:108138588
	chr18:20853553:20853704
	chr2:127315479:127315580
	chr20:38282363:38282474
	chr19:39828407:39828761
	chr11:42875037:42875453
	chr2:113770821:113770942
	chr8:136611348:136611470
	chr2:218894228:218894309
	chr8:60179490:60179590
	chrX:81047861:81047937
	chr8:116070908:116071015
	chr6:55276985:55277111
	chr22:19925003:19925309
	chr10:118121469:118121651
	chr16:19950558:19950777
	chr3:45180062:45180154
	chr13:33557660:33557765
	chr5:158341509:158341698
	chr9:14677962:14678040
	chr3:195868524:195868766
	chr10:60551158:60551273
	chr3:185415082:185415201
	chr21:23570130:23570322
	chr16:70131715:70131836
	chr2:137572069:137572248
	chr22:35759695:35759798
	chr11:59864019:59864139
	chr6:12222807:12222985
	chr8:4744872:4745001
	chr6:50446385:50446467
	chrX:142217043:142217324
	chr4:64980909:64981037
	chr12:130659733:130659805
	chr16:64682971:64683195
	chr1:186123394:186123603
	chr7:9412655:9412796
	chr20:43154223:43154291
	chr10:1894074:1894279
	chr3:2192817:2192901
	chr6:1477755:1477967
	chr8:31198210:31198462
	chr8:112921950:112922084
	chr12:125822089:125822265
	chr10:21006736:21006867
	chr2:79833424:79833686
	chr5:15783146:15783258
	chr10:3407322:3407546
	chr8:138519649:138519835
	chr14:49144612:49144713
	chr5:122007129:122007334
	chr8:137806993:137807071
	chr10:128113776:128113908
	chr8:33530621:33530726
	chr6:166191159:166191322
	chr2:48659342:48659502
	chr16:2764975:2765067
	chr20:48449535:48449740
	chr18:75567751:75567840
	chr5:158250177:158250312
	chr8:26626009:26626067
	chr1:106870142:106870219
	chr1:221752910:221753248
	chr21:41730461:41730563
	chr3:112878282:112878404
	chr2:2610469:2610654
	chr14:93706410:93706673
	chr1:244299122:244299242
	chr3:117895788:117895992
	chr3:2450962:2451153
	chr21:45608400:45608691
	chr4:179499088:179499224
	chr1:39136985:39137195
	chr10:37228102:37228166
	chr6:33347847:33347975
	chr1:236681032:236681266
	chr13:111634821:111635009
	chr3:141656830:141657186
	chr5:166853018:166853128
	chr11:10373844:10373990
	chr1:238922475:238922606
	chr18:12606719:12606824
	chr17:72416136:72416269
	chr1:172558174:172558251
	chr4:177093092:177093168
	chr11:58241458:58241586
	chr6:57600144:57600277
	chr6:7561329:7561635
	chr6:73304083:73304200
	chr8:136627056:136627183
	chr10:13972618:13972682
	chr19:17568834:17568903
	chr16:73904644:73904722
	chr19:53428202:53428255
	chr4:18759194:18759296
	chr3:196689869:196690005
	chr5:155604072:155604300
	chr21:26505697:26505862
	chr13:61797953:61798052
	chr4:183225458:183225661
	chr6:99484413:99484525
	chr22:49583957:49584173
	chr15:59243472:59243651
	chr10:2343592:2343678
	chr2:2460664:2460805
	chr17:71879433:71879748
	chr8:73149555:73149646
	chr14:27716239:27716368
	chr5:116679561:116679932
	chr13:82803162:82803499
	chr7:148327190:148327291
	chr5:30988756:30988969
	chr4:182082290:182082451
	chr2:116421310:116421558
	chr22:42959832:42960003
	chr16:71632742:71632801
	chr7:139356328:139356590
	chr16:83058128:83058256
	chr2:11000267:11000488
	chr1:115863200:115863311
	chr13:68478470:68478537
	chr2:117879456:117879569
	chr4:150229342:150229472
	chr5:64103562:64103677
	chr8:88870856:88870995
	chr8:17611421:17611496
	chr4:173443522:173443620
	chr7:126358012:126358248
	chr5:165581088:165581223
	chr12:3056549:3056740
	chr14:101253096:101253239
	chr10:82173535:82173754
	chr3:82443164:82443259
	chr15:86991179:86991333
	chr3:28582537:28582614
	chr11:132109013:132109125
	chr1:248146987:248147092
	chr11:49378496:49378625
	chr16:10704609:10704730
	chr10:49952861:49952909
	chr12:24218304:24218567
	chr17:49229424:49229990
	chr11:133088183:133088319
	chr12:38451226:38451459
	chr21:26144267:26144539
	chr21:22494104:22494184
	chr2:541602:541737
	chr2:41638406:41638613
	chr4:183192795:183192900
	chr12:71930016:71930102
	chr7:38673155:38673295
	chr5:912383:912861
	chr6:72743253:72743481
	chr13:101574735:101574819
	chr5:157966550:157966768
	chr19:19156853:19157067
	chr9:66011043:66011211
	chr1:11036247:11036712
	chr7:144889423:144889684
	chr7:30326409:30326676
	chr2:131496380:131496469
	chr1:239579546:239579677
	chr9:117949869:117949948
	chr18:75921030:75921165
	chr4:185759359:185759444
	chr4:62190753:62190945
	chr10:7493813:7494045
	chr6:9405865:9405933
	chr2:49496607:49496782
	chr19:8798773:8798875
	chr5:42847200:42847419
	chr2:83631895:83632163
	chr5:111067166:111067269
	chr7:146487644:146487701
	chr7:9346469:9346702
	chr11:91549432:91549599
	chr5:18283753:18283840
	chr8:40694328:40694430
	chr13:31247064:31247188
	chr4:103941706:103941897
	chr1:64687491:64687627
	chr20:42526341:42526587
	chr1:149161327:149161432
	chr10:108476968:108477068
	chr4:27522133:27522467
	chr3:68060856:68060956
	chr8:71891412:71891496
	chr8:5771785:5771957
	chr1:75578079:75578553
	chr3:93697945:93698084
	chr5:155411510:155411643
	chr11:39946052:39946175
	chr12:15688443:15688549
	chr11:2307000:2307248
	chr4:182815900:182816004
	chr7:25133298:25133585
	chr10:45527342:45527509
	chr8:112494860:112495044
	chr2:57809222:57809485
	chr8:67975809:67975964
	chr2:39349288:39349342
	chr21:47211341:47211571
	chr3:21420790:21420887
	chr15:37953799:37953934
	chr19:46685867:46686005
	chr21:20552708:20552783
	chr7:49570973:49571144
	chr12:10025308:10025630
	chr12:53637912:53638004
	chr10:108054666:108054745
	chr2:27078597:27078723
	chr20:56717605:56717949
	chr13:26501612:26501735
	chr3:13334826:13334899
	chr17:76574499:76574602
	chr16:47054087:47054182
	chr10:109685674:109685807
	chr4:42668241:42668344
	chr13:60255040:60255132
	chr18:2876082:2876275
	chr4:5519751:5520333
	chr6:63002170:63002424
	chr1:10594630:10594738
	chr18:1126671:1126802
	chr20:38064050:38064229
	chr1:240849903:240850057
	chr6:164743235:164743491
	chr4:21339491:21339609
	chr7:27086962:27087055
	chr3:195691027:195691231
	chr4:148463912:148463990
	chr13:96392608:96393072
	chr11:128151948:128152140
	chr19:55448818:55448931
	chr1:231643982:231644109
	chr12:23229141:23229568
	chr1:111219861:111219990
	chr7:146634306:146634494
	chr11:104082707:104082820
	chr2:176459116:176459335
	chr4:99401182:99401313
	chr7:156820703:156820842
	chr2:60153683:60153821
	chr1:168538968:168539178
	chr1:157769437:157769547
	chr1:150891053:150891253
	chr16:8098968:8099123
	chr5:166893834:166893980
	chr18:40606242:40606390
	chr4:181992758:181992923
	chr3:194168090:194168201
	chr2:79158021:79158134
	chr4:44540190:44540457
	chr13:92347713:92347924
	chr6:31530809:31530894
	chr10:100774397:100774488
	chr13:22657971:22658122
	chr8:36507141:36507276
	chr10:1749494:1749889
	chr9:8638911:8639121
	chr4:190471623:190471844
	chr21:20454308:20454543
	chr1:66191081:66191182
	chr3:94771125:94771268
	chr6:132014640:132014769
	chr20:42907971:42908215
	chr11:132856805:132856988
	chr4:20921186:20921378
	chr7:5611501:5611843
	chr12:45781970:45782099
	chr16:55632651:55633141
	chr7:157423086:157423277
	chr8:2350004:2350098
	chr21:32022659:32022907
	chr15:50158642:50158811
	chr2:5498571:5498758
	chr5:29897159:29897389
	chr10:128029739:128029865
	chr7:154150436:154150517
	chr1:236628584:236628707
	chr1:238973471:238973590
	chr7:28841425:28841486
	chr21:10937669:10937828
	chr16:86359653:86359750
	chr4:127293205:127293341
	chr17:73961659:73961807
	chr14:52715607:52715749
	chr11:115420844:115420991
	chr16:8228017:8228122
	chr7:1033824:1033942
	chr5:113269322:113269543
	chr10:26540908:26541019
	chr15:101712316:101712554
	chr14:74455494:74455620
	chr3:117312650:117312843
	chr21:19398028:19398131
	chr10:2100596:2100654
	chr12:20661930:20662061
	chr6:39650643:39650730
	chr14:88295090:88295199
	chr13:25147775:25147916
	chr2:8344416:8344507
	chr2:116164529:116164660
	chr18:74708087:74708155
	chr18:50503981:50504234
	chr5:118333788:118333921
	chr11:36880186:36880319
	chr2:151536134:151536254
	chr3:98274418:98274781
	chr2:77739100:77739198
	chr4:6002522:6002715
	chr3:65770120:65770375
	chr22:41584357:41584488
	chr1:248313611:248313736
	chr8:133542890:133543021
	chr5:62280064:62280197
	chr16:10101446:10101572
	chr22:26327295:26327438
	chr16:65311413:65311526
	chr5:51730802:51730993
	chr16:5329480:5329606
	chr14:48398979:48399213
	chr13:54008731:54008845
	chr1:108230616:108230808
	chr12:111677199:111677334
	chr16:48355075:48355417
	chr20:11874754:11874867
	chr2:29291446:29291626
	chr12:23510442:23510560
	chr14:29621924:29622040
	chr15:86828773:86828879
	chr8:46942029:46942192
	chr5:158148240:158148371
	chr5:12648205:12648276
	chr21:26061676:26061993
	chr7:147766570:147766847
	chr10:21877152:21877292
	chr5:6564501:6564624
	chr9:80902711:80902967
	chr12:26844721:26844839
	chr12:13003131:13003364
	chr12:4966321:4966438
	chr8:120657367:120657519
	chr8:77520905:77521011
	chr21:10924505:10924618
	chr7:139523429:139523574
	chr4:22486056:22486207
	chr5:30095823:30095919
	chr13:37879768:37879873
	chr1:203306631:203306845
	chr17:68207510:68207565
	chr1:176865596:176865707
	chr8:24408512:24408599
	chr7:37060053:37060183
	chr3:109048120:109048314
	chr10:107098871:107098948
	chr11:131768783:131769015
	chr21:39979288:39979384
	chr10:2638934:2639041
	chr17:56744967:56745233
	chr8:112113327:112113625
	chr8:66146386:66146532
	chr12:40422180:40422285
	chr12:130234661:130234922
	chr17:11232642:11232745
	chr10:24055610:24055801
	chr7:155938035:155938124
	chr16:7056218:7056450
	chr13:94714528:94714617
	chr13:84733035:84733172
	chr2:382910:383053
	chr6:106228076:106228313
	chr9:97566944:97567060
	chr7:3140352:3140534
	chr9:8646931:8647073
	chr20:47074522:47074585
	chr12:22740154:22740277
	chr3:161291926:161292101
	chr18:67375744:67376015
	chr1:34337389:34337489
	chr21:25151433:25151532
	chr12:20090320:20090430
	chr8:116544165:116544283
	chr15:49995301:49995530
	chr6:82810895:82811395
	chr2:7475953:7476051
	chr6:159228119:159228342
	chr10:52433577:52433720
	chr5:156196274:156196521
	chr5:12068126:12068244
	chr2:137251615:137251873
	chr7:36954052:36954417
	chr6:73587694:73587950
	chr10:78344289:78344519
	chr12:24379462:24379562
	chr16:76031531:76031692
	chr9:16843911:16844031
	chr4:103929609:103929783
	chr1:34460366:34460463
	chr1:185911215:185911280
	chr1:18155029:18155189
	chr10:18459907:18459999
	chr7:18822472:18822707
	chr5:165110515:165110788
	chr4:17000229:17000344
	chr5:148288518:148288662
	chr2:38200833:38201012
	chr8:112891967:112892115
	chr10:61504628:61504763
	chr4:61998764:61998855
	chr14:52394815:52395066
	chr5:89563588:89563785
	chr5:118063457:118063556
	chr20:13620399:13620497
	chr8:66434496:66434546
	chr5:158178282:158178343
	chr2:200339879:200340027
	chr5:163208964:163209043
	chr10:19442667:19442792
	chr3:22480765:22480864
	chr8:143810380:143810975
	chr7:32248233:32248354
	chr15:76434371:76434496
	chr5:6142002:6142132
	chr5:20441453:20441497
	chr7:50193897:50194003
	chr3:85961555:85961642
	chr8:54647211:54647338
	chr7:13564274:13564456
	chr11:127201869:127201937
	chr6:109058657:109059006
	chr4:176745385:176745577
	chr10:117713625:117713746
	chr13:34839986:34840096
	chr3:52518025:52518158
	chr7:96568146:96568279
	chr20:4906696:4906962
	chr7:146179695:146179810
	chr7:146042494:146042613
	chr5:31136877:31137079
	chr8:137116833:137116920
	chr21:34732579:34732652
	chr14:78553671:78553780
	chr5:25836670:25836761
	chr1:239227619:239227710
	chr18:41072118:41072305
	chr10:2454644:2454782
	chr6:38925934:38926081
	chr4:17119211:17119319
	chr13:87934354:87934410
	chr3:174535804:174535940
	chr10:126278193:126278706
	chr7:4650235:4650340
	chr18:55828552:55828651
	chr22:35012625:35012727
	chr7:6983166:6983261
	chr17:659376:659673
	chr7:145687745:145687882
	chr6:77615567:77615926
	chr8:4269604:4269706
	chr11:121039452:121039613
	chr6:58428880:58429069
	chr5:2614776:2615019
	chr5:132025235:132025465
	chr16:8012862:8012967
	chr8:55934411:55934750
	chr4:56476351:56476587
	chr6:5413062:5413229
	chr5:20247592:20247742
	chr8:144140504:144140607
	chr11:123745310:123745402
	chr5:2450862:2450962
	chr21:36439102:36439241
	chr16:20121418:20121529
	chr4:48477928:48478048
	chr11:73779869:73780000
	chr10:17336767:17336986
	chr20:55026703:55026849
	chr22:33089173:33089381
	chr11:10888441:10888605
	chr10:84612389:84612536
	chr8:4802142:4802339
	chr12:77456739:77456957
	chr2:172436441:172436572
	chr21:41559131:41559275
	chr6:28796278:28796370
	chr15:87088972:87089079
	chr8:142519337:142519492
	chr12:31422697:31422800
	chr8:55847162:55847407
	chr14:72620700:72620870
	chr13:84980271:84980361
	chr6:96552429:96552698
	chr1:85085589:85085687
	chr12:96861672:96861912
	chr16:24505291:24505393
	chr13:54137664:54137794
	chr4:20928627:20928726
	chr5:97947835:97947981
	chr20:3879584:3879647
	chr4:1512207:1512438
	chr10:10423069:10423341
	chr1:211839860:211840090
	chr15:87764702:87764967
	chr7:153872030:153872117
[truncated: 317 more rows]

## Sheet: Japanese cohort
Summary of 475 overlaping MHBs in Japanese cohort
Chr	Start	End
chr1	8121849	8122047
chr1	9486939	9487124
chr1	11036247	11036712
chr1	15392777	15393042
chr1	15655626	15655784
chr1	18155029	18155189
chr1	18896340	18896576
chr1	22708921	22708954
chr1	28422834	28423043
chr1	46797512	46797942
chr1	61087297	61087533
chr1	75578079	75578553
chr1	84744688	84744808
chr1	88641388	88641497
chr1	95201138	95201376
chr1	108230616	108230808
chr1	119521882	119522025
chr1	119522368	119523030
chr1	119528348	119528717
chr1	151812210	151812725
chr1	156131100	156131443
chr1	159043000	159043117
chr1	172558174	172558251
chr1	174207940	174208432
chr1	197883106	197883311
chr1	198828157	198828250
chr1	199277428	199277548
chr1	199552234	199552327
chr1	203298063	203298201
chr1	213898742	213898866
chr1	214382264	214382472
chr1	220128422	220128548
chr1	227204673	227204774
chr1	229038525	229038653
chr1	232556937	232557096
chr1	244262843	244263002
chr1	245215135	245215294
chr1	246930863	246930982
chr1	247611745	247612047
chr2	579623	579799
chr2	1378035	1378213
chr2	7597024	7597418
chr2	10637202	10637347
chr2	11000267	11000488
chr2	13187274	13187414
chr2	19555703	19556273
chr2	26045101	26045369
chr2	29291446	29291626
chr2	38200833	38201012
chr2	44511465	44511569
chr2	45438082	45438194
chr2	51231649	51231830
chr2	63982439	63982537
chr2	65303660	65303780
chr2	80245482	80245685
chr2	88895988	88896128
chr2	111875088	111876061
chr2	113563184	113563465
chr2	151536134	151536254
chr2	164458085	164458204
chr2	173150626	173150761
chr2	179610805	179610900
chr2	186611436	186611521
chr2	190351176	190351321
chr2	197033823	197034085
chr2	198120455	198120617
chr2	201652328	201652765
chr2	204571215	204571408
chr2	216363280	216363466
chr2	218894228	218894309
chr2	234157688	234157773
chr2	234399562	234399668
chr2	234465509	234465698
chr2	240162170	240162556
chr3	4992893	4993025
chr3	16930515	16930668
chr3	23715358	23715410
chr3	27235639	27235902
chr3	40429403	40429651
chr3	42033411	42033612
chr3	52518025	52518158
chr3	57679202	57679510
chr3	68060856	68060956
chr3	79023542	79023667
chr3	98044224	98044367
chr3	101442616	101442885
chr3	107408361	107408476
chr3	131050334	131050803
chr3	135741887	135742018
chr3	143363179	143363263
chr3	143530562	143530629
chr3	151112406	151112642
chr3	153224122	153224685
chr3	155471198	155471252
chr3	169383902	169384207
chr3	172355911	172356107
chr3	174691391	174691491
chr3	181442887	181443144
chr3	182154378	182154508
chr3	183642843	183642935
chr3	184918581	184918694
chr3	185406350	185406625
chr3	189506718	189506856
chr3	192980771	192980886
chr3	194168090	194168201
chr3	195868524	195868766
chr4	1512207	1512438
chr4	5519751	5520333
chr4	10782603	10783045
chr4	13548011	13548133
chr4	13907269	13907369
chr4	24825672	24825814
chr4	25875576	25875873
chr4	30271573	30271704
chr4	40476225	40476420
chr4	42491232	42491358
chr4	48477928	48478048
chr4	48754953	48755065
chr4	69239374	69239606
chr4	78058704	78058800
chr4	78803185	78803264
chr4	81117537	81117743
chr4	85417018	85417370
chr4	95868781	95868913
chr4	104641701	104641897
chr4	111551079	111551338
chr4	122685129	122685390
chr4	140787881	140788083
chr4	140968487	140968836
chr4	154354124	154354404
chr4	155662676	155662877
chr4	177804777	177804824
chr4	183603013	183603167
chr4	183995569	183995672
chr4	184831820	184831901
chr4	189183975	189184190
chr5	912383	912861
chr5	14108369	14108433
chr5	16509426	16509636
chr5	16758192	16758320
chr5	23411278	23411554
chr5	28287389	28287676
chr5	31131664	31131750
chr5	31240821	31240926
chr5	42949249	42949681
chr5	42991495	42991888
chr5	59784102	59784370
chr5	60464779	60464900
chr5	71079131	71079258
chr5	76010401	76010516
chr5	87565542	87565714
chr5	110418850	110419110
chr5	112538919	112539395
chr5	115912100	115912560
chr5	130233188	130233745
chr5	139227441	139228069
chr5	145235917	145236393
chr5	148288518	148288662
chr5	165765837	165765992
chr5	178208341	178208634
chr5	178946715	178947045
chr5	180651500	180651777
chr6	1077371	1077669
chr6	1477755	1477967
chr6	1724451	1724613
chr6	5115540	5115722
chr6	16215580	16215673
chr6	26305339	26305571
chr6	27513206	27513571
chr6	27858751	27859219
chr6	28174875	28174942
chr6	28661712	28661925
chr6	28664112	28664326
chr6	28781763	28781988
chr6	28921392	28921849
chr6	30094947	30095100
chr6	32849980	32850171
chr6	46760990	46761212
chr6	47202127	47202609
chr6	56044455	56044648
chr6	82810895	82811395
chr6	83268113	83268537
chr6	105403885	105404107
chr6	106228076	106228313
chr6	108442906	108443024
chr6	112465962	112466122
chr6	123957826	123957959
chr6	136869869	136870126
chr6	137018413	137018515
chr6	137493729	137493848
chr6	141179795	141179927
chr6	149140574	149140643
chr6	158571884	158571972
chr6	161860471	161860767
chr6	164058015	164058218
chr6	166191159	166191322
chr7	2726417	2726647
chr7	7839209	7839284
chr7	17349606	17349714
chr7	20784900	20784985
chr7	27241870	27242340
chr7	29232610	29232774
chr7	30326409	30326676
chr7	32697704	32697812
chr7	37136116	37136311
chr7	38673155	38673295
chr7	44583220	44583610
chr7	50346986	50347082
chr7	50893284	50893462
chr7	50905734	50905980
chr7	51418184	51418306
chr7	90228695	90228815
chr7	90269101	90269566
chr7	92325129	92325360
chr7	92939955	92940088
chr7	96641146	96641233
chr7	96641456	96641559
chr7	108168534	108168683
chr7	111721109	111721252
chr7	114670675	114671149
chr7	116311299	116311451
chr7	116364117	116364544
chr7	123167949	123168396
chr7	139685203	139685279
chr7	143582429	143582678
chr7	148843076	148843433
chr7	148902894	148903302
chr7	151249252	151249449
chr7	156409689	156409905
chr7	156820703	156820842
chr7	157046632	157046866
chr7	157423086	157423277
chr8	871247	871473
chr8	1906202	1906598
chr8	6762772	6762893
chr8	8522680	8522927
chr8	8534358	8534517
chr8	17352688	17352899
chr8	17611421	17611496
chr8	23088236	23088278
chr8	27945047	27945239
chr8	28570535	28570721
chr8	36167197	36167348
chr8	42012281	42012514
chr8	48871585	48871711
chr8	49616891	49617204
chr8	49835882	49836231
chr8	54795091	54795547
chr8	58489875	58490030
chr8	60179490	60179590
chr8	65712024	65712166
chr8	65936215	65936329
chr8	67975809	67975964
chr8	72361241	72361354
chr8	74282708	74283008
chr8	81478005	81478514
chr8	83118690	83119015
chr8	91411312	91411724
chr8	102516332	102516458
chr8	103121102	103121273
chr8	106459959	106460070
chr8	114896424	114896517
chr8	119154741	119154815
chr8	120657367	120657519
chr8	134131947	134132084
chr8	134224475	134224910
chr8	134918037	134918089
chr8	137806993	137807071
chr8	141116193	141116385
chr8	142160094	142160299
chr8	144242798	144242905
chr8	144254725	144255059
chr9	4174713	4174939
chr9	14323657	14323781
chr9	21968049	21968763
chr9	74421537	74421676
chr9	117084576	117084672
chr9	133892435	133892622
chr9	137387782	137387927
chr9	139136515	139136602
chr9	140609838	140610163
chr10	1749494	1749889
chr10	2699176	2699390
chr10	3133735	3133935
chr10	3977528	3977660
chr10	4213130	4213275
chr10	11141368	11141451
chr10	11302121	11302354
chr10	11905876	11906049
chr10	15296732	15296897
chr10	26540908	26541019
chr10	27548601	27548712
chr10	44498112	44498203
chr10	50748123	50748429
chr10	52433577	52433720
chr10	54078695	54078793
chr10	60551158	60551273
chr10	70184295	70184693
chr10	70321843	70322131
chr10	78344289	78344519
chr10	82173535	82173754
chr10	90402257	90402347
chr10	95255087	95255214
chr10	101768405	101768643
chr10	112553279	112553381
chr10	114323326	114323451
chr10	118892029	118892219
chr10	119292980	119293208
chr10	119310257	119310538
chr10	123781426	123781710
chr10	125240348	125240570
chr10	126278193	126278706
chr10	128113776	128113908
chr10	134703172	134703482
chr11	17485061	17485337
chr11	95932770	95933006
chr11	118098700	118098858
chr11	120338478	120338607
chr11	123487339	123487581
chr11	125109947	125110228
chr11	132031329	132031554
chr12	6471154	6471521
chr12	7088358	7088483
chr12	12911911	12912151
chr12	20661930	20662061
chr12	23229141	23229568
chr12	26844721	26844839
chr12	31399641	31399830
chr12	31422697	31422800
chr12	31499241	31499323
chr12	47226197	47226454
chr12	58150644	58150890
chr12	77456739	77456957
chr12	81102356	81102768
chr12	81107933	81108211
chr12	92171447	92171540
chr12	93415112	93415251
chr12	93838908	93839012
chr12	100040164	100040389
chr12	104764817	104765000
chr12	104853072	104853275
chr12	110662632	110662835
chr12	114836919	114837109
chr12	120148747	120148949
chr12	129931378	129931507
chr12	132349652	132349966
chr13	30947966	30948123
chr13	33543980	33544015
chr13	37879768	37879873
chr13	39199304	39199439
chr13	73754170	73754304
chr13	80387313	80387434
chr13	86086641	86086771
chr13	95359175	95359247
chr13	99431183	99431271
chr13	110042509	110042648
chr13	110696820	110697040
chr13	111045344	111045440
chr13	112723335	112723644
chr14	23700901	23701295
chr14	35850104	35850206
chr14	38054387	38054821
chr14	58335262	58335481
chr14	58931588	58931745
chr14	64218424	64218763
chr14	88473038	88473178
chr14	90167167	90167388
chr14	90848369	90848500
chr14	93706410	93706673
chr14	95438167	95438334
chr14	98629350	98629492
chr14	98655999	98656148
chr14	99707638	99707765
chr14	103744909	103745254
chr14	105725306	105725379
chr15	22551812	22551931
chr15	25093192	25093606
chr15	31384899	31385003
chr15	37387276	37387614
chr15	37389287	37389618
chr15	45671276	45671360
chr15	46021424	46021527
chr15	50158642	50158811
chr15	53746880	53746936
chr15	54051224	54051336
chr15	57107522	57107830
chr15	60688405	60688623
chr15	69995980	69996083
chr15	76195548	76195668
chr15	78305110	78305589
chr15	85426871	85426937
chr15	86002442	86002578
chr15	91294653	91294808
chr15	91530190	91530374
chr15	96896661	96896811
chr15	98966190	98966269
chr15	101712316	101712554
chr15	102177888	102178104
chr16	6570965	6571091
chr16	10646990	10647377
chr16	14569497	14569629
chr16	20121418	20121529
chr16	21567992	21568281
chr16	24151106	24151207
chr16	48355075	48355417
chr16	52532675	52532793
chr16	67524280	67524411
chr16	78991715	78991936
chr16	81361641	81361748
chr17	1251121	1251247
chr17	5749488	5749622
chr17	14736321	14736449
chr17	28333020	28333129
chr17	30132158	30132545
chr17	38096571	38096695
chr17	42522276	42522332
chr17	46652451	46652551
chr17	47674073	47674148
chr17	48770340	48770412
chr17	51403553	51403663
chr17	55292406	55292543
chr17	56297311	56297516
chr17	70712382	70712721
chr17	71824272	71824428
chr17	73989405	73990002
chr17	75132727	75132882
chr17	78667775	78668114
chr18	8673660	8673840
chr18	9095343	9095435
chr18	12307160	12307650
chr18	20853553	20853704
chr18	46473480	46473769
chr19	264790	264888
chr19	4916569	4917057
chr19	6371411	6371674
chr19	8745107	8745221
chr19	12266453	12266533
chr19	17568834	17568903
chr19	24269521	24269597
chr19	33592193	33592424
chr19	34624808	34624976
chr19	39828407	39828761
chr19	41712715	41712877
chr19	52772170	52772306
chr19	53402746	53403142
chr19	54877591	54877828
chr19	55296810	55297035
chr20	4906696	4906962
chr20	11874754	11874867
chr20	13183336	13183456
chr20	19894580	19894765
chr20	33064006	33064397
chr20	42079952	42080048
chr20	43346569	43346815
chr20	52480818	52480931
chr20	56123836	56123915
chr20	56717605	56717949
chr20	57531144	57531343
chr20	62795387	62795482
chr21	10937669	10937828
chr21	15669490	15669682
chr21	36577346	36577582
chr21	37356937	37357155
chr21	38076508	38077271
chr21	39830486	39830641
chr21	43815962	43816281
chr21	47813867	47814401
chr22	19925003	19925309
chr22	21025362	21025708
chr22	35759695	35759798
chr22	40357502	40357681
chr22	43187069	43187248
chr22	43351210	43351396
chr22	49850854	49851143
chr22	50918292	50918502

## Sheet: TCGA cohort
Summary of 601 overlaping MHBs in TCGA cohort
Chr	Start	End
chr1	150333819	150334031
chr3	55123592	55123756
chr11	123487339	123487581
chr17	48770340	48770412
chr17	78667775	78668114
chr1	119521882	119522025
chr6	30094947	30095100
chr10	559317	559548
chr3	181442887	181443144
chr3	112012944	112013163
chr2	12538123	12538248
chr6	133689927	133689993
chr12	31522989	31523126
chr3	171430032	171430174
chr3	68060856	68060956
chr1	115238457	115238574
chr17	20060367	20060629
chr14	90848369	90848500
chr5	148288518	148288662
chr19	52772170	52772306
chr4	81117537	81117743
chr2	579623	579799
chr10	70184295	70184693
chr8	141728457	141728569
chr17	17397872	17398129
chr8	1054899	1055157
chr4	186425585	186425888
chr13	114054196	114054263
chr11	4010500	4010822
chr7	132032245	132032338
chr1	244262843	244263002
chr1	2733459	2733659
chr10	101768405	101768643
chr1	246930863	246930982
chr11	114479616	114479802
chr10	134968560	134968882
chr3	196370100	196370255
chr1	119531551	119531833
chr10	1749494	1749889
chr10	78734718	78734818
chr17	46672882	46673206
chr12	31499241	31499323
chr18	76161545	76161652
chr6	28781763	28781988
chr12	115112411	115112757
chr17	71824272	71824428
chr6	167761160	167761292
chr13	112901098	112901214
chr2	26045101	26045369
chr4	154354124	154354404
chr9	21968049	21968763
chr8	107459909	107460256
chr6	3766566	3766739
chr5	59784102	59784370
chr3	61924715	61924803
chr10	7486935	7487051
chr6	123957826	123957959
chr15	45671276	45671360
chr7	26897071	26897312
chr10	52433577	52433720
chr3	71294190	71294381
chr5	139227441	139228069
chr22	50918292	50918502
chrX	137820702	137820821
chr1	11744230	11744333
chr2	21320297	21320415
chr16	10934333	10934508
chr13	94205636	94205758
chr13	33543980	33544015
chr11	61049353	61049711
chr6	105807930	105808043
chr7	157493924	157494034
chr11	64617564	64617812
chr1	146649515	146649852
chr6	166139905	166140017
chr10	1308841	1308963
chr20	62795387	62795482
chr6	26305339	26305571
chr7	148902894	148903302
chr2	198120455	198120617
chr17	34989322	34989478
chr4	190228225	190228304
chrX	40037087	40037419
chr8	1242206	1242331
chr15	90775442	90775599
chr10	114323326	114323451
chr10	82173535	82173754
chr6	167559786	167559928
chr8	123874998	123875538
chr6	28174875	28174942
chr3	11178471	11178799
chr20	61471904	61472256
chr7	7839209	7839284
chr12	42539475	42539513
chr8	42012281	42012514
chr12	129931378	129931507
chr10	127789783	127789891
chr1	235268578	235268682
chr12	104853072	104853275
chr17	63624532	63624856
chr15	37387276	37387614
chr10	131671682	131671850
chr11	132205444	132205588
chr2	158694670	158694832
chr8	56832342	56832497
chr5	180651500	180651777
chr5	2990146	2990290
chr4	177804777	177804824
chr14	90323691	90323779
chr4	85417018	85417370
chr8	49835882	49836231
chr10	119310257	119310538
chr6	149751415	149751495
chr8	49984904	49985022
chr8	63777334	63777431
chr2	225276814	225277097
chr1	61087297	61087533
chr2	1378035	1378213
chr10	2487078	2487201
chr4	151001867	151001974
chr6	16303016	16303208
chr2	102856861	102856986
chr7	130530667	130530813
chr4	114214067	114214279
chr1	15655626	15655784
chr16	14569497	14569629
chr8	142289583	142289877
chr7	143582429	143582678
chr5	3787857	3787952
chr14	38054387	38054821
chr8	99959430	99959700
chr9	2157690	2158084
chr10	126278193	126278706
chr12	131492800	131492936
chr8	61119533	61119661
chr1	236849305	236849392
chr1	247611745	247612047
chr1	151812210	151812725
chr18	46473480	46473769
chr10	108393920	108393996
chr17	12695640	12695802
chr9	112877057	112877280
chr12	32530635	32530719
chr19	6413869	6414038
chr1	110210173	110210266
chr14	103744909	103745254
chr16	88166826	88167093
chr10	11866847	11866992
chr19	58219657	58220573
chr1	47899327	47899902
chr6	138893097	138893415
chr15	48500240	48500331
chr6	75796125	75796269
chr4	87280792	87280843
chr3	135741887	135742018
chr6	167768359	167768491
chr11	125109947	125110228
chr14	93706410	93706673
chr10	119806848	119807176
chr17	40896005	40896112
chr2	63284448	63284648
chr4	183995569	183995672
chr15	85426871	85426937
chr8	25442428	25442548
chr13	68220788	68220849
chr7	157678859	157678994
chr18	76485448	76485698
chr12	108028360	108028561
chr8	65936215	65936329
chr11	70829889	70830120
chr8	1370166	1370357
chr2	111875088	111876061
chr8	1906202	1906598
chr15	54051224	54051336
chr1	101005869	101005986
chr15	60688405	60688623
chr7	20866937	20867068
chr6	27513206	27513571
chr1	245215135	245215294
chr6	156428912	156429263
chr2	6712749	6712870
chr3	66454679	66454994
chr3	187491137	187491296
chr11	57982579	57982676
chr2	204571215	204571408
chr15	84540224	84540309
chr6	26240469	26241256
chr6	52051228	52051331
chr1	86044103	86044231
chr1	119528348	119528717
chr8	74333555	74333674
chr13	21005373	21005678
chr10	119292980	119293208
chr22	43810673	43810813
chr5	1639929	1640043
chr2	81425891	81426016
chr1	238024400	238024485
chr5	71079131	71079258
chr14	98629350	98629492
chr2	145764765	145764942
chr1	230367518	230367683
chr4	76599468	76599598
chr10	70321843	70322131
chr19	10593154	10593814
chr2	40377759	40377850
chr6	83268113	83268537
chr7	157423086	157423277
chr17	6557857	6558065
chr17	46683709	46684113
chr2	1234674	1234757
chr2	176979223	176979432
chr5	2302307	2302718
chr17	70712382	70712721
chr10	15296732	15296897
chr1	227204673	227204774
chr10	1208896	1209364
chr5	76010401	76010516
chr12	93838908	93839012
chr22	18986559	18986778
chr17	46645818	46646044
chr9	114557193	114557576
chr8	81478005	81478514
chr10	123494761	123495012
chr10	116080418	116080744
chr8	71381126	71381217
chr13	60026399	60026518
chr10	128113776	128113908
chr6	168433414	168433510
chr5	71505453	71505610
chr2	74980612	74980810
chr17	35303200	35303316
chr1	28422834	28423043
chr13	112723335	112723644
chr11	6273519	6273732
chr6	3053424	3053647
chr7	30326409	30326676
chr6	161860471	161860767
chr15	37389287	37389618
chr7	19443733	19443826
chr6	31786747	31787120
chr12	127067792	127068047
chr10	72311997	72312145
chr1	197883106	197883311
chr14	70236253	70236428
chr5	42949249	42949681
chr5	87964017	87964120
chr21	46001928	46002062
chr4	159442776	159442870
chr3	116735063	116735160
chr3	73160429	73160613
chr4	111551079	111551338
chr4	190529399	190529526
chr2	162101042	162101208
chr2	11989565	11989705
chr6	3527325	3527567
chr14	58335262	58335481
chr1	18155029	18155189
chr13	110696820	110697040
chr8	17352688	17352899
chr6	26183478	26183693
chr17	63060041	63060169
chr12	58150644	58150890
chr14	88473038	88473178
chr2	169100884	169101329
chr6	112465962	112466122
chr17	46652451	46652551
chr18	10589053	10589447
chr10	114853744	114853947
chr8	29211078	29211143
chr11	56258645	56258857
chr6	27858751	27859219
chr9	98075285	98075793
chr7	96641456	96641559
chr3	76292109	76292422
chr3	191930926	191931003
chr2	33906245	33906341
chr18	11818628	11818755
chr1	156131100	156131443
chr4	169952070	169952254
chr2	162282764	162282981
chr2	51231649	51231830
chr21	43815962	43816281
chr7	158965314	158965481
chr19	4916569	4917057
chr2	1648264	1648570
chr8	999071	999177
chr7	27241870	27242340
chr1	12603803	12603855
chr7	156409689	156409905
chr4	11652247	11652629
chr6	10384781	10385216
chr10	34815724	34815844
chr8	142160094	142160299
chr13	25485381	25485488
chr3	194854321	194854515
chr13	34208754	34208963
chr13	110937564	110937655
chr13	100636740	100636871
chr18	11692409	11692525
chr1	245524425	245524570
chr10	92794681	92794807
chr17	76102354	76102469
chr1	9486939	9487124
chr21	28214746	28214981
chr7	158595801	158595974
chr2	7597024	7597418
chr5	9523266	9523367
chr2	19555703	19556273
chr5	112538919	112539395
chr20	61618970	61619227
chr8	139124422	139124499
chr8	101348359	101348837
chr16	24151106	24151207
chr4	802695	802874
chr13	102060551	102060672
chr12	47219510	47219959
chr10	127913945	127914133
chr19	56459103	56459278
chr3	189506718	189506856
chr1	248284896	248284972
chr16	53163482	53163640
chr10	3977528	3977660
chr22	46473498	46473741
chr16	81439328	81439589
chr11	76371754	76372315
chr6	32847112	32847211
chr16	20121418	20121529
chr20	238088	238218
chr2	215675394	215675669
chr4	122685129	122685390
chr14	99707638	99707765
chr7	5227303	5227440
chr12	7889195	7889287
chr6	28661712	28661925
chr6	25027422	25027587
chr21	38737243	38737386
chr8	2020639	2020824
chr4	3372841	3373098
chr17	80794081	80794527
chr4	184831820	184831901
chr1	119522368	119523030
chr2	217540529	217540642
chr16	52532675	52532793
chr4	155662676	155662877
chr5	1608385	1608729
chr6	64151502	64151796
chr7	24767500	24767700
chr3	14307941	14308154
chr5	912383	912861
chr6	159128237	159128362
chr8	137806993	137807071
chr2	749015	749192
chr8	3855301	3855517
chr20	11874754	11874867
chr2	229890278	229890608
chr2	64088430	64088525
chr15	97307746	97307928
chr16	70749475	70749841
chr1	117058474	117058626
chr10	134703172	134703482
chr7	70252662	70252812
chr16	65789495	65789594
chr5	61028051	61028304
chr15	101712316	101712554
chr4	69239374	69239606
chr5	3853518	3853735
chr21	27540106	27540288
chr16	78991715	78991936
chr18	14478397	14478589
chr8	134224475	134224910
chr6	138892880	138893008
chr4	10458040	10458347
chr8	1983003	1983457
chr15	37307298	37307514
chr14	90167167	90167388
chr17	873236	873554
chr5	137224156	137224285
chr20	30195916	30195998
chr7	41188917	41189039
chr6	168915948	168916027
chr8	144254725	144255059
chr5	14108369	14108433
chr3	35720994	35721167
chr7	150499276	150499386
chr10	2699176	2699390
chr7	2726417	2726647
chr5	42991495	42991888
chr16	21567992	21568281
chr18	8366807	8367099
chr8	35186277	35186364
chr6	112340209	112340454
chr18	25570082	25570210
chr6	10555155	10555265
chr5	7827388	7827581
chr2	1926820	1926965
chr16	12241458	12241621
chr11	132031329	132031554
chr2	65303660	65303780
chr1	203298063	203298201
chr10	11069201	11069347
chr8	142316435	142316530
chr8	57909634	57909743
chr2	201652328	201652765
chr1	15392777	15393042
chr21	45577464	45577871
chr6	155782918	155783025
chr10	2125734	2125951
chr7	20784900	20784985
chr12	109548681	109549322
chr13	95359175	95359247
chr1	199552234	199552327
chr1	198828157	198828250
chr6	121656457	121656625
chr10	130684659	130684874
chr8	42234161	42234244
chr5	87565542	87565714
chr3	103532469	103532676
chr5	115912100	115912560
chr13	112239214	112239402
chr21	46065504	46065597
chr7	111721109	111721252
chr10	44360818	44360920
chr20	56728343	56728608
chr17	14736321	14736449
chr20	137860	137949
chr16	85319995	85320266
chr2	1695270	1695431
chr7	4228725	4228956
chr11	127811401	127811683
chr7	136928644	136928763
chr10	12087933	12088088
chr6	47202127	47202609
chr6	28227418	28227548
chr7	157567230	157567493
chr2	1027806	1028006
chr8	115598804	115599098
chr16	2300569	2300703
chr1	88271515	88271593
chr15	93139108	93139155
chr2	102616491	102616578
chr10	2817965	2818188
chr10	27548601	27548712
chr5	14816929	14817061
chr13	20807225	20807436
chr14	101451527	101451740
chr14	88625272	88625383
chr12	2801514	2801720
chr1	25246809	25246969
chr6	168556536	168556794
chr7	137675808	137675979
chr15	96896661	96896811
chr21	36577346	36577582
chr9	16310881	16311231
chr2	775101	775235
chr2	2590634	2590913
chr4	183710282	183710396
chr8	106406152	106406413
chr2	65889806	65889985
chr7	26677374	26677504
chr18	515420	515642
chr12	81102356	81102768
chr2	1105502	1105661
chr1	8083868	8083950
chr13	25562702	25562841
chr5	60464779	60464900
chr8	871247	871473
chr5	67484094	67484213
chr2	127933926	127934185
chr10	2125270	2125473
chr6	28921392	28921849
chr5	5288233	5288345
chr5	1974795	1975020
chr12	47226197	47226454
chr5	140739501	140739601
chr1	193155208	193155321
chr7	2847412	2847637
chr8	116573823	116573954
chr17	12453202	12453353
chr7	40938874	40939170
chr2	153504333	153504490
chr6	31799358	31799576
chr6	46760990	46761212
chr9	123690455	123690659
chr4	122249902	122250199
chr4	48754953	48755065
chr3	131754133	131754274
chr12	79201571	79201669
chr13	109859478	109859548
chr15	25093192	25093606
chr2	114334043	114334100
chr1	155904747	155904917
chr4	114038454	114038564
chr7	28477515	28477649
chr2	240162170	240162556
chr10	118892029	118892219
chr2	37375983	37376068
chr1	32084283	32084405
chr7	29605237	29605452
chr1	7815962	7816176
chr1	224075776	224075986
chr8	74282708	74283008
chr17	46676844	46676974
chr7	37533568	37533777
chr6	28664112	28664326
chr6	108442906	108443024
chr21	35574923	35575199
chr12	124283872	124283966
chr5	118693717	118693790
chr4	89679482	89679572
chr8	28458769	28458884
chr8	125738325	125738504
chr10	119876163	119876328
chr7	48009552	48009755
chr5	54405888	54406017
chr17	19995223	19995331
chr17	75143097	75143336
chr10	123781426	123781710
chr3	183755469	183755520
chr6	49604332	49604443
chr16	87938092	87938413
chr2	6326889	6326995
chr14	53256849	53256961
chr5	157965198	157965309
chr8	50892702	50892961
chr8	77618582	77618894
chr12	67197798	67197852
chr10	44839864	44839946
chr1	120905897	120906337
chr10	6162634	6162916
chr2	51254021	51254171
chr12	81107933	81108211
chr8	70584783	70584961
chr10	131142734	131143019
chr4	186835742	186835946
chr18	29027658	29027803
chr14	21483525	21483642
chr19	2273047	2273246
chr17	56297311	56297516
chr5	166782175	166782272
chr12	6471154	6471521
chr12	72083300	72083433
chr13	107865324	107865499
chr8	93620150	93620245
chr5	145235917	145236393
chr1	7307849	7308146
chr8	1596115	1596425
chr17	78735227	78735399
chr10	134800553	134800755
chr8	144973550	144973722
chr7	50346986	50347082
chr5	1182847	1183283
chr21	38076508	38077271
chr9	117084576	117084672
chr19	34624808	34624976
chr5	8059348	8059488
chr5	76939728	76939903
chr3	118892215	118892673
chr3	139653232	139653361
chr4	190026926	190027326
chr3	35785958	35786271
chr1	36348138	36348279
chr20	5829391	5829485
chr6	105403885	105404107
chr1	25167432	25167528
chr12	47471654	47472053
chr6	167529509	167529679
chr13	114074308	114074472
chr13	113538027	113538192
chr6	166984468	166984787
chr8	134467165	134467236
chr9	97671380	97671574
chr5	135231514	135231578
chr1	170638888	170639002
chr5	4207370	4207843
chr1	86968039	86968267
chr5	10149911	10150084
chr5	160477	160638
chr13	23898273	23898365
chr8	54795091	54795547
chr14	25395519	25395656
chr1	95201138	95201376
chr5	3185747	3185963
chr2	85281029	85281143
chr7	157710421	157710622
chr15	101729242	101729560
chr3	2942487	2942578
chr5	169308355	169308599
chrX	29332135	29332249
chr8	93156338	93156523
chr9	99481705	99481842
chr3	108837620	108837747
chr3	160942741	160942932
chr6	35285647	35286767
chr15	69995980	69996083
chr17	63632069	63632117
chr17	75096139	75096412
chr16	10646990	10647377
chr6	28677297	28677522
chr13	112875300	112875527
chr17	77361589	77361673
chr18	12307160	12307650
